# Supplementary material for: The Effect of Citalopram on Genome-Wide DNA Methylation of Human Cells
Source: Hindawi journal article supplement (doi:10.1155/2018/8929057), 2018-07-25

miR-199a-5p (and other miRNAs w/seed CCAGUGU)

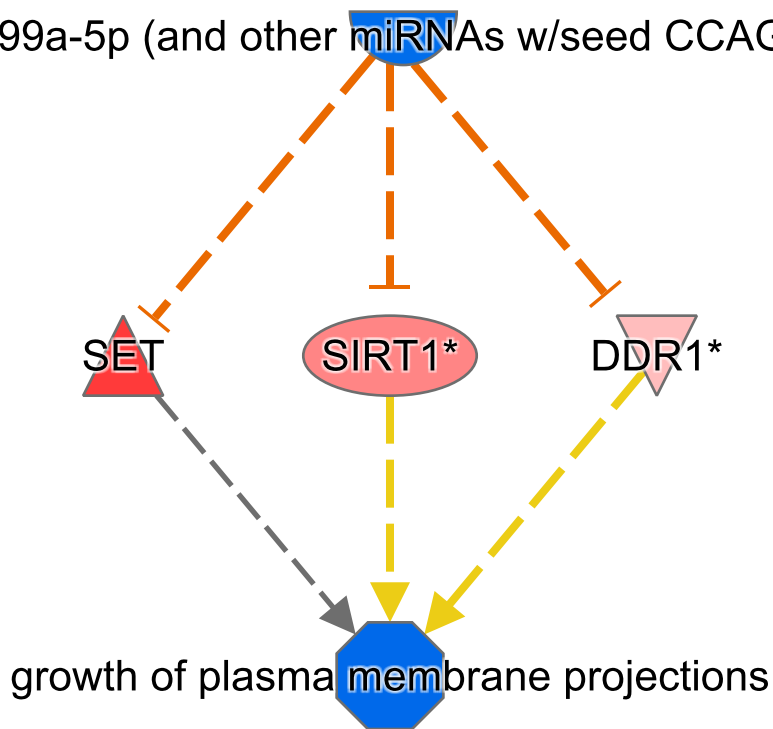

Supplement: f7 [file 8929057.f7.pdf]
