# Supplementary material for: The Effect of Citalopram on Genome-Wide DNA Methylation of Human Cells
Source: Int J Genomics. 2018 Jul 25;2018:8929057. doi: 10.1155/2018/8929057 (PMC6083487; doi:10.1155/2018/8929057)
Supplement: Supplementary 2 — Supplement 2a: table with a list of significantly differentially methylated peaks (p < 0.01) that lie within 2000 base pairs of the transcription start site of a gene, generated using the initial raw data. All coordinates were transformed from hg18 to hg38, and the genes were reannotated. Peaks were remapped to the latest genome (hg38) and refiltered according to distance from the nearest gene TSS. The “Direction” column indicates which way the differential methylation goes (hypermethylated in treated or hypomethylated). The “Peak differential methylation” column (col M) shows the average difference in methylation level between treated and untreated (positive values are higher methylation in treated compared to untreated; negatives are lower). There are more peaks hypermethylated in treated than hypomethylated (354 hypermethylated peaks versus 272 hypomethylated peaks). Each peak lies within 2000 base pairs of one or more genes. The list of genes is in column C and the distance of their TSS from the middle of the peak is in column L. Positive numbers indicate that the peak middle is upstream of the TSS; negative numbers indicate that the peak middle is downstream. Supplement 2b: means and standard deviations for all of the significant peaks. [file 8929057.f2.zip]

Archive with 2 entries (2 files):
- Supplement 2b, Means and Standard Deviations.xlsx
- Supplement 2a, Significant peaks - citalopram.xls
