# Supplementary material for: The Effect of Citalopram on Genome-Wide DNA Methylation of Human Cells
Source: Int J Genomics. 2018 Jul 25;2018:8929057. doi: 10.1155/2018/8929057 (PMC6083487; doi:10.1155/2018/8929057)
Supplement: Supplementary 2 — Supplement 2a: table with a list of significantly differentially methylated peaks (p < 0.01) that lie within 2000 base pairs of the transcription start site of a gene, generated using the initial raw data. All coordinates were transformed from hg18 to hg38, and the genes were reannotated. Peaks were remapped to the latest genome (hg38) and refiltered according to distance from the nearest gene TSS. The “Direction” column indicates which way the differential methylation goes (hypermethylated in treated or hypomethylated). The “Peak differential methylation” column (col M) shows the average difference in methylation level between treated and untreated (positive values are higher methylation in treated compared to untreated; negatives are lower). There are more peaks hypermethylated in treated than hypomethylated (354 hypermethylated peaks versus 272 hypomethylated peaks). Each peak lies within 2000 base pairs of one or more genes. The list of genes is in column C and the distance of their TSS from the middle of the peak is in column L. Positive numbers indicate that the peak middle is upstream of the TSS; negative numbers indicate that the peak middle is downstream. Supplement 2b: means and standard deviations for all of the significant peaks. [file 8929057.f2.zip › Supplement 2a, Significant peaks - citalopram.xls]

## Sheet: Significant peaks
PeakID	Direction	Gene	Transcript	Gene chromosome	Gene transcription start (TSS)	Gene transcription end	Gene strand	Peak chromsome	Peak start	Peak end	Peak mid to TSS	Peak differential methylation	Differential methylation p-value
15401	Hypomethylated in treated	ING2	NM_001564	chr4	183505049	183512428	+	chr4	183504526	183505299	-137	-0.52226	4.2658e-05
15441	Hypomethylated in treated	MDFI	NM_005586	chr6	41638456	41654244	+	chr6	41637813	41638745	-177	-0.525497	4.46684e-05
8032	Hypermethylated in treated	LIME1	NM_017806	chr20	63736459	63739107	+	chr20	63735332	63736279	-653	0.407476	7.24436e-05
8159	Hypermethylated in treated	MARVELD2	NM_001038603	chr5	69415111	69442063	+	chr5	69414825	69415280	-59	0.502954	8.70964e-05
8112	Hypermethylated in treated	EIF2A	NM_032025	chr3	150546677	150586016	+	chr3	150545652	150546501	-601	0.408622	9.33254e-05
7901	Hypermethylated in treated	CD37	NM_001774	chr19	49335419	49340604	+	chr19	49333462	49334203	-1587	0.444682	9.77237e-05
7888	Hypermethylated in treated	AXL	NM_001699	chr19	41219198	41261767	+	chr19	41218990	41219859	226	0.459182	0.000109648
15364	Hypomethylated in treated	PLCXD2	NM_153268	chr3	111674675	111846447	+	chr3	111674767	111675294	355	-0.349447	0.000131826
8230	Hypermethylated in treated	PPP1R14C	NM_030949	chr6	150143051	150250392	+	chr6	150142711	150143461	35	0.447085	0.000138038
15059	Hypomethylated in treated	SNORD116-3|SNORD116-10|SNORD116-9|SNORD116-11	NR_003318|NR_003325|NR_003324|NR_003326	chr15|chr15|chr15|chr15	25073105|25074112|25073105|25075927	25073202|25074216|25073202|25076021	+|+|+|+	chr15	25073572	25074924	1143|136|1143|-1679	-0.493183	0.000138038
15252	Hypomethylated in treated	MAPRE3	NM_012326	chr2	26970370	27027219	+	chr2	26969135	26969779	-913	-0.456705	0.000138038
15061	Hypomethylated in treated	SNORD115-39	NR_003354	chr15	25241745	25241827	+	chr15	25240902	25241575	-507	-0.404586	0.000151356
8297	Hypermethylated in treated	SGK3	NM_170709	chr8	66775180	66862022	+	chr8	66774429	66775370	-280	0.428523	0.000169824
7736	Hypermethylated in treated	SENP3	NM_015670	chr17	7561991	7571969	+	chr17	7560072	7560411	-1749	0.465618	0.000194984
8203	Hypermethylated in treated	LTA|LTA	NM_001159740|NM_000595	chr6|chr6	31572098|31572293	31574323|31574323	+|+	chr6	31572477	31573181	731|536	0.53545	0.000199526
7965	Hypermethylated in treated	MGAT5	NM_002410	chr2	134254258	134454621	+	chr2	134252894	134253461	-1080	0.432509	0.00020893
15210	Hypomethylated in treated	ZNF568	NM_198539	chr19	36916328	36952743	+	chr19	36916442	36917215	500	-0.488509	0.00020893
8256	Hypermethylated in treated	TPST1	NM_003596	chr7	66205271	66360451	+	chr7	66205101	66205955	257	0.532111	0.000218776
7692	Hypermethylated in treated	MIR762	NR_031576	chr16	30893902	30893985	+	chr16	30893470	30894037	-148	0.536713	0.000239883
7769	Hypermethylated in treated	AOC4P	NR_002773	chr17	42867144	42869217	+	chr17	42866443	42866994	-426	0.476912	0.000251189
8319	Hypermethylated in treated	MIR661	NR_030383	chr8	143945190	143945279	-	chr8	143945088	143945651	-180	0.347557	0.000263027
14825	Hypomethylated in treated	RNU11	NR_004407	chr1	28648599	28648734	+	chr1	28647158	28647589	-1225	-0.789704	0.000263027
8427	Hypermethylated in treated	CSF2RA	NM_172246	chrY	1268799	1309935	+	chrY	1267302	1267813	-1241	0.346938	0.000269153
8413	Hypermethylated in treated	FAM127A	NM_001078171	chrX	135032302	135033545	+	chrX	135031326	135032811	-234	0.495445	0.000275423
14896	Hypomethylated in treated	SORCS3	NM_014978	chr10	104641100	105265242	+	chr10	104639360	104639729	-1556	-0.493788	0.000288403
15579	Hypomethylated in treated	SSR4	NM_006280	chrX	153794563	153798512	+	chrX	153792999	153793354	-1387	-0.267708	0.000295121
15116	Hypomethylated in treated	PSMD7	NM_002811	chr16	74296774	74306288	+	chr16	74296767	74297396	308	-0.528491	0.00030903
7618	Hypermethylated in treated	CHAMP1	NM_032436	chr13	114314489	114327328	+	chr13	114313799	114314632	-273	0.522626	0.000331131
7919	Hypermethylated in treated	ZNF583|ZNF583|ZNF583	NM_152478|NM_001159860|NM_001159861	chr19|chr19|chr19	56404324|56404013|56404348	56425031|56425031|56425031	+|+|+	chr19	56403683	56404226	-370|-59|-394	0.349609	0.000380189
7376	Hypermethylated in treated	ZBTB48	NM_005341	chr1	6579990	6589280	+	chr1	6579541	6580098	-170	0.375619	0.000389045
14971	Hypomethylated in treated	CD9	NM_001769	chr12	6200315	6238271	+	chr12	6198149	6199124	-1679	-0.319383	0.000389045
7391	Hypermethylated in treated	CCDC28B	NM_024296	chr1	32200385	32205390	+	chr1	32200666	32201220	558	0.372319	0.000398107
8219	Hypermethylated in treated	SMAP1	NM_021940	chr6	70667770	70862013	+	chr6	70667405	70668344	104	0.639652	0.000398107
15442	Hypomethylated in treated	PRICKLE4	NM_013397	chr6	41780761	41787372	+	chr6	41780541	41781094	57	-0.265951	0.000398107
8432	Hypermethylated in treated	CSPG4P1Y	NR_001554	chrY	25482907	25486705	+	chrY	25482925	25483478	295	0.35765	0.00040738
15054	Hypomethylated in treated	SIVA1	NM_021709	chr14	104753132	104759659	+	chr14	104753269	104753740	372	-0.538888	0.00040738
15514	Hypomethylated in treated	DMRT1	NM_021951	chr9	841689	969091	+	chr9	841574	842199	197	-0.364734	0.00040738
8360	Hypermethylated in treated	CEL	NM_001807	chr9	133061977	133071863	+	chr9	133061451	133062317	-93	0.398179	0.00042658
7822	Hypermethylated in treated	PHLPP1	NM_194449	chr18	62715438	62980443	+	chr18	62714637	62715598	-320	0.334914	0.000457088
15017	Hypomethylated in treated	PDX1	NM_000209	chr13	27920030	27926314	+	chr13	27918970	27919321	-884	-0.355384	0.000457088
7497	Hypermethylated in treated	OR51G1	NM_001005237	chr11	4923373	4924339	-	chr11	4923740	4924199	-597	0.301353	0.000467735
7360	Hypermethylated in treated	HES4	NM_001142467	chr1	998963	1000172	-	chr1	1000608	1001281	-1981	0.421764	0.000501187
7398	Hypermethylated in treated	TOE1	NM_025077	chr1	45339669	45343978	+	chr1	45339586	45339935	91	0.357574	0.000501187
15049	Hypomethylated in treated	SNORD114-7|SNORD114-8	NR_003199|NR_003200	chr14|chr14	100963053|100964780	100963129|100964851	+|+	chr14	100963381	100963736	505|-1222	-0.298018	0.000501187
15537	Hypomethylated in treated	SET	NM_001122821	chr9	128683654	128696396	+	chr9	128683737	128684263	346	-0.668234	0.000501187
14962	Hypomethylated in treated	OR10G4	NM_001004462	chr11	124015574	124016510	+	chr11	124015690	124016133	338	-0.39513	0.000524807
15563	Hypomethylated in treated	OTUD6A	NM_207320	chrX	70062490	70064179	+	chrX	70062695	70063462	588	-0.413759	0.000537032
15139	Hypomethylated in treated	PPP1R1B|PPP1R1B	NM_032192|NM_181505	chr17|chr17	39626923|39628497	39636625|39636625	+|+	chr17	39626907	39627258	159|-1415	-0.287344	0.00057544
15296	Hypomethylated in treated	AAR2	NM_015511	chr20	36236416	36256941	+	chr20	36235028	36235261	-1272	-0.379023	0.00057544
15490	Hypomethylated in treated	PAXIP1-AS1	NR_028090	chr7	155003432	155005703	+	chr7	155003625	155004273	517	-0.387275	0.000588844
15243	Hypomethylated in treated	SSC5D	NM_001144950	chr19	55488502	55519099	+	chr19	55487162	55487411	-1216	-0.439983	0.00060256
15422	Hypomethylated in treated	SNORA74B	NR_002988	chr5	173020725	173020929	+	chr5	173020536	173021093	89	-0.435492	0.00060256
7371	Hypermethylated in treated	ARHGEF16	NM_014448	chr1	3454582	3481113	+	chr1	3452947	3453906	-1156	0.389006	0.000630957
7429	Hypermethylated in treated	SMG7	NM_201568	chr1	183472370	183554193	+	chr1	183471661	183471907	-586	0.580087	0.000630957
7446	Hypermethylated in treated	OR2L13	NM_175911	chr1	247937028	248100922	+	chr1	247937107	247937778	414	0.356988	0.000630957
7761	Hypermethylated in treated	TMEM99	NM_145274	chr17	40819121	40836274	+	chr17	40818921	40819263	-29	0.382538	0.000676083
7940	Hypermethylated in treated	FAM179A	NM_199280	chr2	28981297	29052230	+	chr2	28979367	28979806	-1711	0.490524	0.000691831
15411	Hypomethylated in treated	IL13	NM_002188	chr5	132658172	132661109	+	chr5	132658221	132658780	328	-0.376021	0.000691831
15468	Hypomethylated in treated	HOXA11-AS	NR_002795	chr7	27185407	27189293	+	chr7	27184067	27184532	-1107	-0.393964	0.000691831
7447	Hypermethylated in treated	OR2T3	NM_001005495	chr1	248473350	248474307	+	chr1	248473185	248473954	220	0.508314	0.000707946
7799	Hypermethylated in treated	CCDC137|OXLD1	NM_199287|NM_001039842	chr17|chr17	81666730|81665035	81673906|81666637	+|-	chr17	81666111	81666452	-448|-1247	0.347223	0.000707946
15030	Hypomethylated in treated	OR4K17	NM_001004715	chr14	20117406	20118438	+	chr14	20117683	20118069	470	-0.9094	0.000707946
7511	Hypermethylated in treated	TKFC	NM_015533	chr11	61333181	61348759	+	chr11	61333625	61334072	667	0.537149	0.000724436
8226	Hypermethylated in treated	VTA1	NM_016485	chr6	142147161	142220948	+	chr6	142147057	142147737	236	0.666668	0.000724436
15071	Hypomethylated in treated	CCNB2	NM_004701	chr15	59105084	59125045	+	chr15	59104305	59104922	-470	-0.477266	0.000724436
15227	Hypomethylated in treated	IRGC	NM_019612	chr19	43716061	43720017	+	chr19	43714596	43715129	-1199	-0.432882	0.000724436
7983	Hypermethylated in treated	OR6B2	NM_001005853	chr2	240029490	240030429	-	chr2	240030534	240031792	-1673	0.549756	0.00074131
8162	Hypermethylated in treated	F2R	NM_001992	chr5	76716042	76735780	+	chr5	76714817	76715120	-1074	0.54254	0.00074131
15152	Hypomethylated in treated	GAA	NM_001079804	chr17	80101525	80119882	+	chr17	80099299	80099764	-1993	-0.512472	0.00074131
7413	Hypermethylated in treated	LOC100132111	NR_024237	chr1	151838468	151844165	+	chr1	151838111	151838476	-174	0.713779	0.000758578
7957	Hypermethylated in treated	CHCHD5	NM_032309	chr2	112584436	112589040	+	chr2	112584382	112585042	276	0.653107	0.000758578
15190	Hypomethylated in treated	PDE4A|PDE4A	NM_001111308|NM_001111309	chr19|chr19	10430844|10432434	10469631|10469631	+|+	chr19	10431306	10431653	636|-954	-0.296589	0.000758578
7541	Hypermethylated in treated	VWA5A	NM_014622	chr11	124115403	124146911	+	chr11	124113064	124113937	-1903	0.369956	0.000776247
8231	Hypermethylated in treated	FNDC1	NM_032532	chr6	159169396	159272108	+	chr6	159169781	159170230	610	0.412775	0.000776247
14855	Hypomethylated in treated	DUSP23	NM_017823	chr1	159780945	159782546	+	chr1	159778743	159779805	-1671	-0.383626	0.000776247
15498	Hypomethylated in treated	RBPMS	NM_001008710	chr8	30384500	30572261	+	chr8	30382919	30383080	-1500	-0.364743	0.000776247
8258	Hypermethylated in treated	AUTS2|AUTS2	NM_015570|NM_001127231	chr7|chr7	69598918|69598918	70793068|70793068	+|+	chr7	69598103	69598532	-600|-600	0.474136	0.000794328
15354	Hypomethylated in treated	TREX1	NM_016381	chr3	48465519	48467645	+	chr3	48465537	48466288	393	-0.333101	0.000794328
7400	Hypermethylated in treated	SCP2	NM_002979	chr1	52927228	53051617	+	chr1	52927428	52927977	474	0.304116	0.000812831
7630	Hypermethylated in treated	FLRT2	NM_013231	chr14	85530143	85627926	+	chr14	85529528	85530177	-291	0.31615	0.000831764
15000	Hypomethylated in treated	ARL6IP4	NM_018694	chr12	122980059	122982913	+	chr12	122979413	122979642	-531	-0.121791	0.000831764
8086	Hypermethylated in treated	CTDSPL	NM_005808	chr3	37862177	37984469	+	chr3	37860475	37860926	-1477	0.618478	0.000851138
8394	Hypermethylated in treated	PLP2	NM_002668	chrX	49171836	49175119	+	chrX	49169487	49170437	-1874	0.603843	0.000851138
15060	Hypomethylated in treated	SNORD115-28|SNORD115-36|SNORD115-11|SNORD115-43|SNORD115-29	NR_003497|NR_003351|NR_003303|NR_003358|NR_003344	chr15|chr15|chr15|chr15|chr15	25222353|25223245|25223245|25223245|25223245	25222427|25223327|25223327|25223327|25223327	+|+|+|+|+	chr15	25222797	25223350	721|-171|-171|-171|-171	-0.352267	0.000851138
15453	Hypomethylated in treated	PCMT1	NM_005389	chr6	149749694	149811421	+	chr6	149748839	149749266	-642	-0.622912	0.000870964
7746	Hypermethylated in treated	LLGL1	NM_004140	chr17	18225621	18244874	+	chr17	18225181	18225622	-219	0.323159	0.000912011
15570	Hypomethylated in treated	CLDN2	NM_020384	chrX	106920375	106930861	+	chrX	106920802	106921059	555	-0.439613	0.000912011
7676	Hypermethylated in treated	TBC1D24	NM_020705	chr16	2475145	2505733	+	chr16	2473183	2473534	-1787	0.487864	0.000933254
7937	Hypermethylated in treated	AGBL5	NM_021831	chr2	27051622	27070622	+	chr2	27051881	27052210	424	0.693422	0.000933254
15285	Hypomethylated in treated	ANO7	NM_001001891	chr2	241188508	241225376	+	chr2	241187562	241187992	-731	-0.369574	0.000933254
8287	Hypermethylated in treated	DPYSL2	NM_001386	chr8	26577823	26658177	+	chr8	26577689	26578361	202	0.474328	0.000977237
15051	Hypomethylated in treated	DIO3|MIR1247	NM_001362|NR_031649	chr14|chr14	101561350|101560286	101563452|101560422	+|-	chr14	101561935	101562284	760|-1824	-0.383434	0.000977237
7872	Hypermethylated in treated	PROSER3|HSPB6	NM_001039887|NM_144617	chr19|chr19	35758142|35754565	35769175|35757029	+|-	chr19	35756028	35756501	-1878|-1699	0.310097	0.001
7873	Hypermethylated in treated	ZNF146	NM_001099639	chr19	36214601	36238773	+	chr19	36213786	36214435	-491	0.284145	0.001
7945	Hypermethylated in treated	PCBP1	NM_006196	chr2	70087452	70089202	+	chr2	70087843	70088300	620	0.338554	0.001
7643	Hypermethylated in treated	PAK6	NM_020168	chr15	40239796	40277487	+	chr15	40238649	40239106	-918	0.36585	0.00102329
8361	Hypermethylated in treated	ADAMTS13	NM_139027	chr9	133421999	133459403	+	chr9	133420383	133420811	-1402	0.577341	0.00102329
7459	Hypermethylated in treated	PALD1	NM_014431	chr10	70478807	70568450	+	chr10	70478817	70479378	291	0.365586	0.00104713
7499	Hypermethylated in treated	NLRP14	NM_176822	chr11	7020468	7071526	+	chr11	7019699	7020548	-344	0.281608	0.00104713
7930	Hypermethylated in treated	SOX11	NM_003108	chr2	5692666	5701385	+	chr2	5691226	5691997	-1054	0.28854	0.00104713
8027	Hypermethylated in treated	FLJ16779	NR_024389	chr20	63253977	63261615	+	chr20	63253880	63254331	129	0.473476	0.00104713
8054	Hypermethylated in treated	RANBP1	NM_002882	chr22	20117423	20127357	+	chr22	20117380	20117811	173	0.595487	0.00104713
8388	Hypermethylated in treated	PTCHD1	NM_173495	chrX	23334867	23396801	+	chrX	23334403	23334871	-230	0.537762	0.00107152
7966	Hypermethylated in treated	CXCR4	NM_001008540	chr2	136114348	136116243	-	chr2	136115640	136116430	-1687	0.359853	0.00109648
8011	Hypermethylated in treated	PCIF1	NM_022104	chr20	45934677	45948023	+	chr20	45934266	45935023	-33	0.419673	0.00109648
8033	Hypermethylated in treated	SLC2A4RG	NM_020062	chr20	63739857	63744050	+	chr20	63738542	63739467	-853	0.263382	0.00109648
7899	Hypermethylated in treated	CGB3	NM_000737	chr19	49022868	49024375	-	chr19	49023851	49024394	-1254	0.491698	0.00112202
7926	Hypermethylated in treated	CENPBD1P1	NR_026052	chr19	58575398	58584395	+	chr19	58573358	58573907	-1766	0.22067	0.00112202
8154	Hypermethylated in treated	UBE2QL1	NM_001145161	chr5	6448622	6496721	+	chr5	6447932	6448475	-418	0.284147	0.00112202
15209	Hypomethylated in treated	WDR62	NM_173636	chr19	36054880	36105110	+	chr19	36054241	36054494	-512	-0.387648	0.00112202
15325	Hypomethylated in treated	CCT8L2	NM_014406	chr22	16590757	16592810	-	chr22	16592324	16592749	-1779	-0.231244	0.00112202
7701	Hypermethylated in treated	TSNAXIP1	NM_018430	chr16	67806877	67828068	+	chr16	67805409	67805740	-1303	0.455083	0.00114815
7675	Hypermethylated in treated	C16orf59	NM_025108	chr16	2460113	2464963	+	chr16	2459629	2460278	-159	0.521318	0.0011749
8156	Hypermethylated in treated	ANKRD33B	NM_001164440	chr5	10564322	10657816	+	chr5	10564553	10565490	700	0.41025	0.0011749
15012	Hypomethylated in treated	PABPC3	NM_030979	chr13	25096137	25098566	+	chr13	25095937	25096088	-125	-0.366961	0.0011749
15451	Hypomethylated in treated	TMEM200A	NM_052913	chr6	130437116	130443065	+	chr6	130435621	130436150	-1230	-0.521051	0.0011749
15047	Hypomethylated in treated	GLRX5|SCARNA13	NM_016417|NR_003002	chr14|chr14	95534985|95533354	95544718|95533629	+|-	chr14	95535095	95535364	245|-1876	-0.248801	0.00120226
15389	Hypomethylated in treated	DOK7	NM_173660	chr4	3463305	3494482	+	chr4	3460889	3462128	-1797	-0.438642	0.00120226
15523	Hypomethylated in treated	FAM95B1	NR_026759	chr9	40323570	40329220	+	chr9	40322955	40323094	-546	-0.103705	0.00120226
7781	Hypermethylated in treated	RPS6KB1	NM_003161	chr17	59893045	59950425	+	chr17	59892586	59893038	-233	0.392319	0.00123027
15217	Hypomethylated in treated	ERICH4	NM_001130514	chr19	41443157	41444765	+	chr19	41443294	41443728	354	-0.443134	0.00123027
15272	Hypomethylated in treated	OSBPL6	NM_032523	chr2	178194480	178399433	+	chr2	178194331	178194560	-34	-0.497184	0.00123027
7546	Hypermethylated in treated	APLP2	NM_001142278	chr11	130069820	130144811	+	chr11	130069895	130070454	354	0.30832	0.00125893
8160	Hypermethylated in treated	HEXB	NM_000521	chr5	74685143	74721288	+	chr5	74685459	74685721	447	0.403929	0.00125893
14969	Hypomethylated in treated	WNT5B	NM_032642	chr12	1629245	1647212	+	chr12	1627448	1627987	-1527	-0.215536	0.00125893
7670	Hypermethylated in treated	SNORA78|SNHG9|SNORA64	NR_003020|NR_003142|NR_002326	chr16|chr16|chr16	1965183|1964995|1962972	1965310|1965504|1963106	+|+|-	chr16	1964168	1964829	-685|-497|-1526	0.247293	0.00128825
8008	Hypermethylated in treated	YWHAB	NM_139323	chr20	44885598	44908532	+	chr20	44885762	44885893	230	0.273196	0.00128825
8365	Hypermethylated in treated	OLFM1|OLFM1	NM_014279|NM_006334	chr9|chr9	135075242|135075256	135121184|135098106	+|+	chr9	135073755	135074208	-1260|-1274	0.599213	0.00128825
15286	Hypomethylated in treated	D2HGDH	NM_152783	chr2	241734578	241768816	+	chr2	241733141	241734046	-984	-0.302679	0.00128825
7959	Hypermethylated in treated	INHBB	NM_002193	chr2	120346142	120351807	+	chr2	120345743	120345911	-315	0.211532	0.00131826
8176	Hypermethylated in treated	NDUFA2|IK	NM_002488|NM_006083	chr5|chr5	140645362|140647798	140647785|140662480	-|+	chr5	140646908	140647455	-1820|-616	0.271948	0.00131826
8068	Hypermethylated in treated	MPST	NM_021126	chr22	37019749	37029822	+	chr22	37019644	37019781	-37	0.141942	0.00134896
8303	Hypermethylated in treated	CTHRC1	NM_138455	chr8	103371514	103383004	+	chr8	103371167	103371615	-123	0.43909	0.00134896
14959	Hypomethylated in treated	APOC3	NM_000040	chr11	116829907	116833071	+	chr11	116828525	116828986	-1151	-0.200755	0.00134896
7972	Hypermethylated in treated	CATIP	NM_198559	chr2	218356855	218368094	+	chr2	218356698	218357263	125	0.518431	0.00138038
14956	Hypomethylated in treated	TIMM8B|SDHD	NM_012459|NM_003002	chr11|chr11	112084810|112086823	112086798|112095801	-|+	chr11	112086466	112086816	-1831|-182	-0.237765	0.00138038
7496	Hypermethylated in treated	MRGPRG|MRGPRG-AS1	NM_001164377|NR_027138	chr11|chr11	3217943|3218331	3218813|3223131	-|+	chr11	3218366	3218939	-709|321	0.438795	0.00141254
7739	Hypermethylated in treated	NAA38|CYB5D1	NM_032356|NM_144607	chr17|chr17	7856684|7857745	7857891|7862282	-|+	chr17	7856953	7857910	-748|-313	0.513078	0.00141254
7776	Hypermethylated in treated	IGF2BP1	NM_001160423	chr17	48997411	49056145	+	chr17	48997397	48997852	213	0.443663	0.00141254
8186	Hypermethylated in treated	FGFR4	NM_213647	chr5	177086871	177098142	+	chr5	177086504	177086753	-243	0.256106	0.00141254
14926	Hypomethylated in treated	FAM111B	NM_198947	chr11	59107184	59127416	+	chr11	59107228	59107692	276	-0.484343	0.00141254
7612	Hypermethylated in treated	ITGBL1	NM_004791	chr13	101452592	101716446	+	chr13	101452635	101453206	328	0.400116	0.00144544
7620	Hypermethylated in treated	OXA1L	NM_005015	chr14	22766521	22771789	+	chr14	22764406	22764641	-1997	0.279879	0.00144544
15108	Hypomethylated in treated	NKD1	NM_033119	chr16	50548329	50640860	+	chr16	50547312	50548263	-541	-0.290616	0.00144544
15141	Hypomethylated in treated	KRTAP9-3	NM_031962	chr17	41232462	41233454	+	chr17	41232607	41232964	324	-0.318856	0.00144544
8396	Hypermethylated in treated	USP27X	NM_001145073	chrX	49879866	49882564	+	chrX	49879150	49879797	-392	0.407597	0.00147911
15036	Hypomethylated in treated	LTB4R	NM_181657	chr14	24313106	24318036	+	chr14	24312119	24312580	-756	-0.379732	0.00147911
7436	Hypermethylated in treated	HHAT	NM_018194	chr1	210328905	210676296	+	chr1	210329231	210329576	499	0.368771	0.00151356
7475	Hypermethylated in treated	PTPRE	NM_130435	chr10	128047548	128085855	+	chr10	128046716	128047671	-354	0.350766	0.00151356
8401	Hypermethylated in treated	INGX	NR_002226	chrX	71491680	71492449	-	chrX	71492244	71492893	-888	0.317588	0.00151356
14914	Hypomethylated in treated	OR52K2	NM_001005172	chr11	4449294	4450361	+	chr11	4449339	4449782	266	-0.278501	0.00151356
14929	Hypomethylated in treated	ASRGL1	NM_025080	chr11	62337301	62393415	+	chr11	62336349	62336786	-733	-0.341573	0.00151356
7898	Hypermethylated in treated	FUT2	NM_001097638	chr19	48695970	48705934	+	chr19	48695710	48696457	114	0.299024	0.00154882
14952	Hypomethylated in treated	THRSP	NM_003251	chr11	78063860	78068357	+	chr11	78061740	78063046	-1467	-0.504878	0.00154882
15148	Hypomethylated in treated	SMIM5	NM_001162995	chr17	75633433	75641406	+	chr17	75632378	75633011	-739	-0.236109	0.00154882
7433	Hypermethylated in treated	SNRPE	NM_003094	chr1	203861584	203871152	+	chr1	203861365	203862108	152	0.315075	0.00158489
7632	Hypermethylated in treated	AMN	NM_030943	chr14	102922655	102930842	+	chr14	102920638	102921067	-1803	0.293624	0.00158489
7793	Hypermethylated in treated	TMC8	NM_152468	chr17	78130777	78142968	+	chr17	78129296	78129657	-1301	0.32017	0.00158489
7690	Hypermethylated in treated	ALDOA	NM_000034	chr16	30053089	30070420	+	chr16	30052752	30053197	-115	0.369058	0.00162181
8170	Hypermethylated in treated	IL3	NM_000588	chr5	132060653	132063203	+	chr5	132059914	132060365	-513	0.426726	0.00162181
15255	Hypomethylated in treated	KRTCAP3	NM_173853	chr2	27442365	27444297	+	chr2	27441182	27441455	-1047	-0.186081	0.00162181
15349	Hypomethylated in treated	HRH1	NM_001098213	chr3	11137092	11263253	+	chr3	11137311	11137652	390	-0.248854	0.00162181
8370	Hypermethylated in treated	GRIN1	NM_000832	chr9	137139156	137168762	+	chr9	137138919	137139068	-162	0.211222	0.00165959
15232	Hypomethylated in treated	IGFL2|IGFL2	NM_001002915|NM_001135113	chr19|chr19	46147781|46148242	46161304|46161304	+|+	chr19	46147789	46148034	131|-330	-0.567988	0.00165959
15550	Hypomethylated in treated	SSNA1	NM_003731	chr9	137188601	137190370	+	chr9	137187876	137188233	-547	-0.355944	0.00165959
7488	Hypermethylated in treated	KRTAP5-AS1	NR_021489	chr11	1572740	1599184	+	chr11	1572200	1572455	-412	0.271203	0.00169824
8362	Hypermethylated in treated	ADAMTSL2	NM_014694	chr9	133534852	133575519	+	chr9	133534994	133535447	368	0.303625	0.00169824
8383	Hypermethylated in treated	TBL1X	NM_005647	chrX	9465160	9719740	+	chrX	9464409	9464956	-478	0.385032	0.00169824
15193	Hypomethylated in treated	SWSAP1	NM_175871	chr19	11374706	11376951	+	chr19	11374181	11374332	-450	-0.439207	0.00169824
15485	Hypomethylated in treated	KLHDC10	NM_014997	chr7	130070508	130135720	+	chr7	130069944	130070229	-422	-0.150289	0.00169824
7558	Hypermethylated in treated	GOLT1B	NM_016072	chr12	21501764	21518403	+	chr12	21500932	21503123	264	0.299707	0.0017378
7753	Hypermethylated in treated	TMEM98	NM_001033504	chr17	32927909	32941649	+	chr17	32928119	32928551	426	0.355306	0.0017378
7931	Hypermethylated in treated	HPCAL1	NM_002149	chr2	10302903	10427617	+	chr2	10301370	10301611	-1413	0.199432	0.0017378
8019	Hypermethylated in treated	LSM14B	NM_144703	chr20	62122460	62135378	+	chr20	62122520	62122655	128	0.187192	0.0017378
8339	Hypermethylated in treated	ANKRD19P	NR_026868	chr9	92809610	92838457	+	chr9	92808660	92809113	-724	0.431824	0.0017378
8356	Hypermethylated in treated	NUP188	NM_015354	chr9	128947692	129007096	+	chr9	128946682	128947047	-828	0.188119	0.0017378
7964	Hypermethylated in treated	CCDC74A	NM_138770	chr2	131527833	131533666	+	chr2	131527778	131528003	57	0.37679	0.00177828
14998	Hypomethylated in treated	SDSL	NM_138432	chr12	113422389	113438276	+	chr12	113422495	113422920	319	-0.290459	0.00177828
15543	Hypomethylated in treated	EGFL7	NM_016215	chr9	136662926	136672678	+	chr9	136661389	136661944	-1260	-0.201773	0.00177828
7708	Hypermethylated in treated	TERF2IP	NM_018975	chr16	75647736	75657443	+	chr16	75646645	75647054	-886	0.343965	0.0018197
8197	Hypermethylated in treated	TMEM170B	NM_001100829	chr6	11538226	11583524	+	chr6	11536933	11537362	-1078	0.39497	0.0018197
8212	Hypermethylated in treated	PI16	NM_153370	chr6	36954432	36964837	+	chr6	36954367	36955011	257	0.474363	0.0018197
8330	Hypermethylated in treated	DNAJB5|DNAJB5	NM_001135005|NM_001135004	chr9|chr9	34990269|34989640	34998433|34998433	+|+	chr9	34989188	34989449	-951|-322	0.155472	0.0018197
14841	Hypomethylated in treated	ACADM	NM_001127328	chr1	75724346	75763678	+	chr1	75723192	75723341	-1080	-0.334243	0.0018197
15460	Hypomethylated in treated	CYP2W1	NM_017781	chr7	983198	989640	+	chr7	983558	983707	434	-0.478602	0.0018197
7671	Hypermethylated in treated	NPW	NM_001099456	chr16	2019519	2020755	+	chr16	2019748	2020299	505	0.355357	0.00186209
14936	Hypomethylated in treated	SSH3	NM_017857	chr11	67303447	67312607	+	chr11	67302902	67303258	-367	-0.583075	0.00186209
15528	Hypomethylated in treated	PLPPR1	NM_207299	chr9	101028748	101325135	+	chr9	101029120	101029681	652	-0.26936	0.00186209
7744	Hypermethylated in treated	ADORA2B	NM_000676	chr17	15944916	15975896	+	chr17	15944703	15944874	-128	0.103311	0.00190546
7768	Hypermethylated in treated	AOC3	NM_003734	chr17	42851183	42858131	+	chr17	42850342	42850467	-779	0.217893	0.00190546
7947	Hypermethylated in treated	EMX1	NM_004097	chr2	72917474	72934891	+	chr2	72917035	72917794	-60	0.389595	0.00190546
8410	Hypermethylated in treated	RAB33A	NM_004794	chrX	130171798	130184870	+	chrX	130171265	130171924	-204	0.25437	0.00190546
14844	Hypomethylated in treated	KCNC4	NM_001039574	chr1	110210713	110234052	+	chr1	110210922	110211051	273	-0.279889	0.00190546
15052	Hypomethylated in treated	PPP2R5C	NM_001161726	chr14	101761797	101927991	+	chr14	101762329	101762563	649	-0.315039	0.00194984
15228	Hypomethylated in treated	ZNF225	NM_013362	chr19	44113394	44133102	+	chr19	44112029	44112202	-1278	-0.0551826	0.00194984
7695	Hypermethylated in treated	CES1P1	NR_003276	chr16	55760598	55774914	+	chr16	55760642	55760791	118	0.0730594	0.00199526
8353	Hypermethylated in treated	SLC2A8	NM_014580	chr9	127397137	127407891	+	chr9	127397747	127398116	795	0.164295	0.00199526
8414	Hypermethylated in treated	SOX3	NM_005634	chrX	140502986	140505060	-	chrX	140503724	140505259	-1506	0.344854	0.00199526
15214	Hypomethylated in treated	LEUTX	NM_001143832	chr19	39776593	39786135	+	chr19	39776052	39776689	-223	-0.240123	0.00199526
7697	Hypermethylated in treated	CCL17	NM_002987	chr16	57404766	57416062	+	chr16	57403950	57404475	-554	0.456291	0.00204174
7935	Hypermethylated in treated	FKBP1B	NM_004116	chr2	24049713	24063680	+	chr2	24048992	24049615	-409	0.391585	0.00204174
15337	Hypomethylated in treated	RFPL3	NM_006604	chr22	32354884	32361161	+	chr22	32353168	32353511	-1544	-0.339626	0.00204174
15534	Hypomethylated in treated	NEK6	NM_001166167	chr9	124257605	124352440	+	chr9	124255540	124255777	-1947	-0.563051	0.00204174
8247	Hypermethylated in treated	MALSU1	NM_138446	chr7	23299320	23309561	+	chr7	23299448	23299901	354	0.39941	0.0020893
15580	Hypomethylated in treated	MIR718	NR_031757	chrX	154019919	154019989	-	chrX	154020939	154021296	-1199	-0.164982	0.0020893
7533	Hypermethylated in treated	PRSS23	NM_007173	chr11	86800239	86811231	+	chr11	86800052	86800491	33	0.283426	0.00213796
7545	Hypermethylated in treated	PATE3	NM_001129883	chr11	125788110	125791600	+	chr11	125787219	125787367	-817	0.195	0.00213796
7812	Hypermethylated in treated	LDLRAD4	NM_001003675	chr18	13611463	13652754	+	chr18	13611065	13611408	-227	0.215709	0.00213796
15487	Hypomethylated in treated	TMEM213	NM_001085429	chr7	138797993	138806026	+	chr7	138796028	138796277	-1841	-0.649134	0.00213796
15546	Hypomethylated in treated	LCNL1	NM_207510	chr9	136982992	136985758	+	chr9	136982998	136983143	78	-0.197053	0.00213796
7415	Hypermethylated in treated	S100A9	NM_002965	chr1	153357853	153361027	+	chr1	153357813	153358464	285	0.336296	0.00218776
7775	Hypermethylated in treated	IGF2BP1	NM_001160423	chr17	48997411	49056145	+	chr17	48996501	48996650	-835	0.408349	0.00218776
7830	Hypermethylated in treated	ARID3A	NM_005224	chr19	926036	972803	+	chr19	925272	925526	-637	0.187178	0.00218776
7992	Hypermethylated in treated	OXT	NM_000915	chr20	3071619	3072517	+	chr20	3070910	3071765	-281	0.297284	0.00218776
7997	Hypermethylated in treated	PAX1	NM_006192	chr20	21705658	21718486	+	chr20	21704402	21705263	-826	0.245878	0.00218776
8104	Hypermethylated in treated	CHCHD6	NM_032343	chr3	126704219	126960420	+	chr3	126703700	126703857	-441	0.362249	0.00218776
8150	Hypermethylated in treated	SPCS3	NM_021928	chr4	176319938	176332245	+	chr4	176320261	176320721	553	0.21257	0.00218776
8232	Hypermethylated in treated	WTAP	NM_152857	chr6	159727499	159749421	+	chr6	159727883	159728250	567	0.639744	0.00218776
8344	Hypermethylated in treated	GALNT12	NM_024642	chr9	98807698	98850081	+	chr9	98806159	98806532	-1352	0.393571	0.00218776
14820	Hypomethylated in treated	LYPLA2	NM_007260	chr1	23791155	23795539	+	chr1	23791114	23791761	283	-0.267511	0.00218776
14883	Hypomethylated in treated	SIRT1|SIRT1	NM_012238|NM_001142498	chr10|chr10	67884668|67885180	67918390|67918390	+|+	chr10	67884129	67884478	-364|-876	-0.41212	0.00218776
14893	Hypomethylated in treated	NFKB2|NFKB2	NM_002502|NM_001077494	chr10|chr10	102395595|102394577	102402529|102402529	+|+	chr10	102394756	102394929	-753|265	-0.306299	0.00218776
7623	Hypermethylated in treated	G2E3	NM_017769	chr14	30559122	30620061	+	chr14	30558892	30559231	-60	0.429505	0.00223872
7738	Hypermethylated in treated	WRAP53	NM_018081	chr17	7688348	7703502	+	chr17	7688730	7688855	444	0.172198	0.00223872
8072	Hypermethylated in treated	SEPT3	NM_145733	chr22	41976926	41998221	+	chr22	41976776	41977111	18	0.280366	0.00223872
15216	Hypomethylated in treated	SPTBN4	NM_025213	chr19	40530487	40560752	+	chr19	40528172	40528903	-1949	-0.294894	0.00223872
15363	Hypomethylated in treated	CD96	NM_005816	chr3	111542078	111652359	+	chr3	111540562	111540807	-1394	-0.408984	0.00223872
7823	Hypermethylated in treated	SERPINB7	NM_001040147	chr18	63753046	63805376	+	chr18	63752915	63753672	248	0.258124	0.00229087
8039	Hypermethylated in treated	KRTAP13-4	NM_181600	chr21	30430275	30430758	+	chr21	30430427	30430900	389	0.376547	0.00229087
8262	Hypermethylated in treated	GATAD1	NM_021167	chr7	92447447	92460067	+	chr7	92447730	92448059	447	0.581379	0.00229087
15075	Hypomethylated in treated	ISLR	NM_005545	chr15	74173745	74176871	+	chr15	74172129	74172462	-1449	-0.0948576	0.00229087
7629	Hypermethylated in treated	TMEM63C	NM_020431	chr14	77181758	77259495	+	chr14	77181868	77182310	331	0.14596	0.00234423
7836	Hypermethylated in treated	AMH	NM_000479	chr19	2249113	2252073	+	chr19	2248084	2248350	-896	0.0983326	0.00234423
8041	Hypermethylated in treated	CBR3	NM_001236	chr21	36134964	36146562	+	chr21	36135048	36135491	306	0.35968	0.00234423
8139	Hypermethylated in treated	POLR2B	NM_000938	chr4	56978639	57031162	+	chr4	56977177	56977633	-1234	0.319591	0.00234423
15299	Hypomethylated in treated	SNORA71A	NR_002911	chr20	38427305	38427443	-	chr20	38428411	38428852	-1327	-0.123751	0.00234423
15372	Hypomethylated in treated	RSRC1	NM_016625	chr3	158110051	158544835	+	chr3	158109620	158109869	-307	-0.293175	0.00234423
15421	Hypomethylated in treated	TLX3	NM_021025	chr5	171309283	171312134	+	chr5	171307167	171307415	-1992	-0.0887743	0.00234423
8050	Hypermethylated in treated	KRTAP10-6	NM_198688	chr21	44591267	44592505	-	chr21	44591909	44592570	-973	0.389766	0.00239883
15379	Hypomethylated in treated	MUC20	NM_152673	chr3	195720881	195733553	+	chr3	195721265	195721499	501	-0.355166	0.00239883
7862	Hypermethylated in treated	KCNN1	NM_002248	chr19	17951301	17999121	+	chr19	17950788	17950931	-441	0.198016	0.00245471
8078	Hypermethylated in treated	TRABD	NM_025204	chr22	50185911	50199599	+	chr22	50184791	50184962	-1035	0.237485	0.00245471
8135	Hypermethylated in treated	RBPJ	NM_015874	chr4	26320806	26435130	+	chr4	26320900	26321367	328	0.251761	0.00245471
14963	Hypomethylated in treated	OR8D1	NM_001002917	chr11	124309839	124310766	-	chr11	124310167	124310410	-449	-0.307254	0.00245471
14990	Hypomethylated in treated	INHBE	NM_031479	chr12	57455312	57458008	+	chr12	57455229	57455372	-12	-0.250071	0.00245471
15240	Hypomethylated in treated	ZNF525	NR_003699	chr19	53365714	53386588	+	chr19	53365600	53365771	-28	-0.122144	0.00245471
15304	Hypomethylated in treated	LINC00494	NR_026958	chr20	48359910	48370638	+	chr20	48358181	48359232	-1204	-0.321177	0.00245471
7392	Hypermethylated in treated	ZSCAN20	NM_145238	chr1	33472630	33496395	+	chr1	33472215	33472472	-286	0.236111	0.00251189
7552	Hypermethylated in treated	CCND2	NM_001759	chr12	4273735	4305356	+	chr12	4273725	4273974	115	0.466199	0.00251189
7657	Hypermethylated in treated	TMED3	NM_007364	chr15	79311061	79322847	+	chr15	79311159	79311524	281	0.275468	0.00251189
7778	Hypermethylated in treated	RSAD1	NM_018346	chr17	50478799	50485980	+	chr17	50479037	50479486	463	0.214011	0.00251189
7807	Hypermethylated in treated	FN3K	NM_022158	chr17	82735575	82751197	+	chr17	82733735	82734609	-1403	0.549363	0.00251189
8260	Hypermethylated in treated	ELN	NM_001081752	chr7	74027788	74069906	+	chr7	74026377	74027305	-947	0.362612	0.00251189
8302	Hypermethylated in treated	FZD6|FZD6	NM_001164615|NM_003506	chr8|chr8	103298432|103298830	103332866|103332866	+|+	chr8	103298844	103299290	635|237	0.237323	0.00251189
14810	Hypomethylated in treated	TTLL10	NM_153254	chr1	1179696	1185863	+	chr1	1180269	1180729	803	-0.345038	0.00251189
14919	Hypomethylated in treated	LDHAL6A	NM_144972	chr11	18455826	18479600	+	chr11	18456001	18456258	304	-0.113959	0.00251189
15329	Hypomethylated in treated	ZNF74	NM_003426	chr22	20394114	20408463	+	chr22	20393710	20394255	-132	-0.160181	0.00251189
15336	Hypomethylated in treated	YWHAH	NM_003405	chr22	31944492	31957603	+	chr22	31943454	31944017	-756	-0.252269	0.00251189
7494	Hypermethylated in treated	KCNQ1	NM_181798	chr11	2461453	2849110	+	chr11	2459137	2459786	-1991	0.307811	0.0025704
7952	Hypermethylated in treated	MAT2A	NM_005911	chr2	85538977	85545280	+	chr2	85539131	85539298	237	0.419033	0.0025704
7989	Hypermethylated in treated	RAD21L1	NM_001136566	chr20	1226119	1254501	+	chr20	1224678	1224825	-1367	0.242766	0.0025704
8020	Hypermethylated in treated	OSBPL2	NM_144498	chr20	62238484	62296213	+	chr20	62237384	62237533	-1026	0.411806	0.0025704
8074	Hypermethylated in treated	TSPO	NM_000714	chr22	43151513	43163242	+	chr22	43150904	43151087	-517	0.100775	0.0025704
8147	Hypermethylated in treated	POU4F2	NM_004575	chr4	146638892	146642471	+	chr4	146639005	146639176	198	0.171615	0.0025704
14865	Hypomethylated in treated	IKBKE	NM_014002	chr1	206470242	206496890	+	chr1	206470237	206470782	268	-0.512675	0.0025704
15145	Hypomethylated in treated	HSD17B1	NM_000413	chr17	42551965	42555214	+	chr17	42550296	42550527	-1553	-0.162725	0.0025704
15540	Hypomethylated in treated	CFAP77	NM_207417	chr9	132410195	132573319	+	chr9	132409911	132410669	95	-0.155091	0.0025704
7869	Hypermethylated in treated	SCGB1B2P	NR_027620	chr19	34576732	34577691	-	chr19	34577947	34578286	-1384	0.183355	0.00263027
8059	Hypermethylated in treated	VPREB1	NM_007128	chr22	22244779	22245515	+	chr22	22243487	22243626	-1223	0.964172	0.00263027
14925	Hypomethylated in treated	OR9G9|OR9G1	NM_001013358|NM_001005213	chr11|chr11	56700387|56700387	56701305|56701305	+|+	chr11	56700569	56700820	307|307	-0.377785	0.00263027
14965	Hypomethylated in treated	HYLS1	NM_001134793	chr11	125887059	125900646	+	chr11	125886936	125887293	55	-0.212781	0.00263027
15032	Hypomethylated in treated	MRPL52	NM_180982	chr14	22829882	22835037	+	chr14	22829488	22829741	-268	-0.379825	0.00263027
15077	Hypomethylated in treated	PPCDC	NM_021823	chr15	75023554	75050726	+	chr15	75022519	75022645	-972	-0.644425	0.00263027
15429	Hypomethylated in treated	MOG	NM_001008229	chr6	29656980	29672372	+	chr6	29655593	29655962	-1202	-0.19673	0.00263027
7622	Hypermethylated in treated	FOXG1	NM_005249	chr14	28767071	28770277	+	chr14	28767064	28767189	55	0.274935	0.00269153
7804	Hypermethylated in treated	GPS1	NM_004127	chr17	82051886	82057470	+	chr17	82050589	82050720	-1232	0.184935	0.00269153
8007	Hypermethylated in treated	TOX2|TOX2	NM_001098797|NM_001098796	chr20|chr20	43914851|43916141	44069614|44069614	+|+	chr20	43915372	43915611	641|-649	0.2312	0.00269153
14910	Hypomethylated in treated	MUC2	NM_002457	chr11	1074874	1110508	+	chr11	1074944	1075407	302	-0.19377	0.00269153
7616	Hypermethylated in treated	TFDP1|TFDP1	NR_026580|NM_007111	chr13|chr13	113584687|113584740	113641473|113641473	+|+	chr13	113583465	113583598	-1155|-1208	0.232702	0.00275423
7951	Hypermethylated in treated	TMSB10	NM_021103	chr2	84905638	84906675	+	chr2	84904622	84905271	-692	0.54558	0.00275423
8182	Hypermethylated in treated	FABP6	NM_001040442	chr5	160199040	160238722	+	chr5	160198876	160199429	112	0.747639	0.00275423
15459	Hypomethylated in treated	CCR6	NM_031409	chr6	167122752	167139141	+	chr6	167122646	167122789	-34	-0.225632	0.00275423
7404	Hypermethylated in treated	PIFO	NM_181643	chr1	111346559	111353017	+	chr1	111346317	111347180	189	0.324214	0.00281838
7495	Hypermethylated in treated	PHLDA2	NM_003311	chr11	2928272	2929420	-	chr11	2929358	2929831	-1322	0.337365	0.00281838
7712	Hypermethylated in treated	GSE1	NM_001134473	chr16	85611422	85676206	+	chr16	85610156	85610405	-1142	0.529559	0.00281838
8005	Hypermethylated in treated	ADIG	NM_001018082	chr20	38581194	38588463	+	chr20	38579356	38579727	-1652	0.322954	0.00281838
8062	Hypermethylated in treated	SGSM1	NM_001098498	chr22	24806220	24926846	+	chr22	24806143	24806578	140	0.262719	0.00281838
8063	Hypermethylated in treated	IGLL3P	NR_029395	chr22	25318256	25320226	+	chr22	25318036	25318379	-48	0.332677	0.00281838
8213	Hypermethylated in treated	GLP1R	NM_002062	chr6	39048780	39087744	+	chr6	39048015	39048240	-652	0.281672	0.00281838
14967	Hypomethylated in treated	IQSEC3	NM_015232	chr12	77375	171328	+	chr12	76043	76396	-1155	-0.26274	0.00281838
15109	Hypomethylated in treated	MT4	NM_032935	chr16	56565048	56568957	+	chr16	56563282	56563627	-1594	-0.545294	0.00281838
7640	Hypermethylated in treated	DKFZP434L187	NR_026771	chr15	30196035	30214540	+	chr15	30195958	30196212	50	0.171474	0.00288403
7779	Hypermethylated in treated	SCPEP1	NM_021626	chr17	56978106	57006768	+	chr17	56978090	56978215	46	0.241579	0.00288403
8406	Hypermethylated in treated	ZCCHC16	NM_001004308	chrX	112083024	112457245	+	chrX	112082407	112082648	-496	0.329325	0.00288403
14975	Hypomethylated in treated	EMG1|SCARNA12	NM_006331|NR_003010	chr12|chr12	6970780|6967336	6976003|6967606	+|-	chr12	6968941	6969377	-1621|-1823	-0.452315	0.00288403
14982	Hypomethylated in treated	AQP6	NM_001652	chr12	49972836	49977139	+	chr12	49971208	49971464	-1500	-0.263116	0.00288403
15242	Hypomethylated in treated	KIR2DL1	NM_014218	chr19	54769812	54784326	+	chr19	54769880	54770167	212	-0.29048	0.00288403
15334	Hypomethylated in treated	MYO18B	NM_032608	chr22	25742143	26031041	+	chr22	25741969	25742511	97	-0.290655	0.00288403
7434	Hypermethylated in treated	IL19	NM_153758	chr1	206798869	206842981	+	chr1	206799099	206799452	407	0.206956	0.00295121
7686	Hypermethylated in treated	SLC5A11	NM_052944	chr16	24846230	24911628	+	chr16	24845491	24846190	-390	0.284846	0.00295121
7689	Hypermethylated in treated	PRRT2	NM_145239	chr16	29812087	29815881	+	chr16	29811247	29811698	-615	0.262185	0.00295121
7866	Hypermethylated in treated	POP4	NM_006627	chr19	29606262	29617255	+	chr19	29605907	29606049	-284	0.179618	0.00295121
8006	Hypermethylated in treated	SLC32A1	NM_080552	chr20	38724461	38729372	+	chr20	38722737	38722972	-1607	0.214569	0.00295121
8184	Hypermethylated in treated	FGF18	NM_003862	chr5	171419662	171457626	+	chr5	171419237	171419482	-302	0.455902	0.00295121
8187	Hypermethylated in treated	PRELID1	NM_013237	chr5	177303761	177306959	+	chr5	177301813	177302742	-1483	0.31008	0.00295121
15099	Hypomethylated in treated	IL21R|IL21R	NM_181078|NM_181079	chr16|chr16	27402161|27402161	27452042|27452042	+|+	chr16	27400861	27401730	-865|-865	-0.306279	0.00295121
7403	Hypermethylated in treated	AHCYL1	NM_006621	chr1	109984764	110023742	+	chr1	109984853	109985298	312	0.33328	0.00301995
7438	Hypermethylated in treated	KCTD3	NM_016121	chr1	215567378	215621821	+	chr1	215566017	215566306	-1216	0.404929	0.00301995
7814	Hypermethylated in treated	GATA6	NM_005257	chr18	22169436	22202528	+	chr18	22169475	22169724	164	0.125794	0.00301995
7922	Hypermethylated in treated	ZNF544	NM_014480	chr19	58228680	58263642	+	chr19	58228738	58228987	182	0.365201	0.00301995
14845	Hypomethylated in treated	DCLRE1B	NM_022836	chr1	113905292	113914086	+	chr1	113905554	113905914	442	-0.20916	0.00301995
14994	Hypomethylated in treated	UBE3B	NM_183415	chr12	109477622	109536705	+	chr12	109476076	109476631	-1268	-0.552679	0.00301995
15086	Hypomethylated in treated	METRN	NM_024042	chr16	715172	717480	+	chr16	713957	714406	-990	-0.350142	0.00301995
15241	Hypomethylated in treated	LENG9	NM_198988	chr19	54461795	54463711	-	chr19	54463592	54463941	-1971	-0.209356	0.00301995
15430	Hypomethylated in treated	DDR1|DDR1	NM_001954|NM_013993	chr6|chr6	30884083|30884549	30900156|30900156	+|+	chr6	30882446	30883903	-909|-1375	-0.224293	0.00301995
15470	Hypomethylated in treated	AVL9	NM_015060	chr7	32495425	32588741	+	chr7	32495906	32496061	559	-0.318855	0.00301995
15477	Hypomethylated in treated	RUNDC3B	NM_001134406	chr7	87628412	87832298	+	chr7	87627650	87628221	-476	-0.423091	0.00301995
7667	Hypermethylated in treated	BAIAP3	NM_003933	chr16	1334503	1349441	+	chr16	1334228	1334371	-203	0.424289	0.0030903
7710	Hypermethylated in treated	WFDC1	NM_021197	chr16	84294705	84329851	+	chr16	84294902	84295453	473	0.391185	0.0030903
7813	Hypermethylated in treated	MC5R	NM_005913	chr18	13825543	13826862	+	chr18	13825652	13825911	239	0.160959	0.0030903
7923	Hypermethylated in treated	ZSCAN22	NM_181846	chr19	58327018	58342346	+	chr19	58325779	58326801	-728	0.429327	0.0030903
8117	Hypermethylated in treated	SST	NM_001048	chr3	187668905	187670413	-	chr3	187669827	187669960	-989	0.548818	0.0030903
14868	Hypomethylated in treated	CNIH3	NM_152495	chr1	224616476	224740547	+	chr1	224617068	224617223	670	-0.337197	0.0030903
15359	Hypomethylated in treated	PRKCD	NM_212539	chr3	53161206	53192717	+	chr3	53161714	53162143	722	-0.205363	0.0030903
15517	Hypomethylated in treated	SH3GL2	NM_003026	chr9	17578953	17797128	+	chr9	17577914	17578139	-927	-0.406272	0.0030903
7817	Hypermethylated in treated	SETBP1|SETBP1	NM_015559|NM_001130110	chr18|chr18	44680897|44680172	45068510|44877414	+|+	chr18	44679295	44679747	-1376|-651	0.24061	0.00316228
15106	Hypomethylated in treated	TGFB1I1	NM_015927	chr16	31473204	31477960	+	chr16	31473441	31473796	414	-0.336035	0.00316228
15283	Hypomethylated in treated	PRR21	NM_001080835	chr2	240041812	240042982	-	chr2	240042690	240042823	-944	-0.204885	0.00316228
15287	Hypomethylated in treated	NEU4	NM_080741	chr2	241810931	241817413	+	chr2	241811338	241811487	481	-0.404283	0.00316228
7462	Hypermethylated in treated	RPS24	NM_001142285	chr10	78033759	78056813	+	chr10	78033867	78034422	385	0.339985	0.00323594
8093	Hypermethylated in treated	CACNA1D	NM_001128839	chr3	53495048	53812465	+	chr3	53495187	53495720	406	0.462754	0.00323594
8387	Hypermethylated in treated	PTCHD1	NM_173495	chrX	23334867	23396801	+	chrX	23333493	23333636	-1303	0.347518	0.00323594
15081	Hypomethylated in treated	AKAP13	NM_007200	chr15	85380615	85749358	+	chr15	85380810	85381274	427	-0.24733	0.00323594
8003	Hypermethylated in treated	TLDC2	NM_080628	chr20	36876120	36894231	+	chr20	36876077	36876818	328	0.540249	0.00331131
8057	Hypermethylated in treated	SNAP29	NM_004782	chr22	20859003	20891213	+	chr22	20857316	20857863	-1413	0.214532	0.00331131
8271	Hypermethylated in treated	MEST	NM_177524	chr7	130486174	130506297	+	chr7	130486479	130486832	482	0.15608	0.00331131
14861	Hypomethylated in treated	CACNA1E	NM_000721	chr1	181483549	181806784	+	chr1	181483613	181483838	177	-0.579302	0.00331131
14948	Hypomethylated in treated	UVRAG	NM_003369	chr11	75815166	76144238	+	chr11	75813303	75813557	-1736	-0.239386	0.00331131
15438	Hypomethylated in treated	DAAM2	NM_015345	chr6	39792996	39904877	+	chr6	39790901	39791133	-1979	-0.311647	0.00331131
7737	Hypermethylated in treated	WRAP53|WRAP53	NM_001143991|NM_018081	chr17|chr17	7687439|7688348	7703502|7703502	+|+	chr17	7687505	7687763	195|-714	0.370299	0.00338844
8001	Hypermethylated in treated	CCM2L	NM_080625	chr20	32010441	32032181	+	chr20	32010675	32011000	397	0.298693	0.00338844
8098	Hypermethylated in treated	LINC00879	NR_015400	chr3	94938262	94991325	+	chr3	94936772	94937400	-1176	0.484967	0.00338844
8355	Hypermethylated in treated	ENDOG	NM_004435	chr9	128818499	128822676	+	chr9	128817534	128817773	-845	0.992924	0.00338844
14811	Hypomethylated in treated	TAS1R3	NM_152228	chr1	1331345	1335320	+	chr1	1331612	1331771	347	-0.345344	0.00338844
14877	Hypomethylated in treated	OR2M5	NM_001004690	chr1	248145147	248146086	+	chr1	248145160	248145625	245	-0.295362	0.00338844
14917	Hypomethylated in treated	KCNC1	NM_001112741	chr11	17735947	17783055	+	chr11	17733807	17734271	-1908	-0.207893	0.00338844
15184	Hypomethylated in treated	HSD11B1L|HSD11B1L|HSD11B1L|HSD11B1L	NM_198707|NM_198533|NM_198705|NM_198706	chr19|chr19|chr19|chr19	5680764|5680764|5680764|5680764	5688523|5688523|5688523|5688523	+|+|+|+	chr19	5679401	5679733	-1197|-1197|-1197|-1197	-0.180976	0.00338844
15295	Hypomethylated in treated	BPIFA3	NM_001042439	chr20	33217309	33227806	+	chr20	33215788	33216057	-1387	-0.313257	0.00338844
15367	Hypomethylated in treated	TRIM42	NM_152616	chr3	140678023	140701150	+	chr3	140678274	140678447	337	-0.694443	0.00338844
7441	Hypermethylated in treated	OBSCN	NM_001098623	chr1	228208129	228378874	+	chr1	228206930	228207171	-1079	0.247825	0.00346737
7861	Hypermethylated in treated	SLC5A5	NM_000453	chr19	17871972	17895174	+	chr19	17871548	17871981	-208	0.303349	0.00346737
7904	Hypermethylated in treated	PTOV1	NM_017432	chr19	49851119	49860744	+	chr19	49850668	49850905	-333	0.0930013	0.00346737
8044	Hypermethylated in treated	WRB	NM_001146218	chr21	39387765	39397889	+	chr21	39387217	39387875	-219	0.326352	0.00346737
8079	Hypermethylated in treated	MAPK8IP2	NM_012324	chr22	50600684	50611551	+	chr22	50599860	50600097	-706	0.239365	0.00346737
8337	Hypermethylated in treated	IDNK	NM_001001551	chr9	83623048	83644130	+	chr9	83623077	83623634	308	0.497248	0.00346737
8379	Hypermethylated in treated	ASMT	NM_004043	chrX	1595454	1643081	+	chrX	1595633	1595764	244	0.396758	0.00346737
14814	Hypomethylated in treated	SLC25A33	NM_032315	chr1	9539468	9582773	+	chr1	9539604	9539765	216	-0.298629	0.00346737
15203	Hypomethylated in treated	MVB12A	NM_138401	chr19	17419846	17425339	+	chr19	17418678	17418959	-1028	-0.549787	0.00346737
7432	Hypermethylated in treated	BTG2	NM_006763	chr1	203305535	203309601	+	chr1	203304895	203305166	-505	0.0566571	0.00354813
7509	Hypermethylated in treated	OR5F1	NM_003697	chr11	55993680	55994625	-	chr11	55994015	55994268	-462	0.378586	0.00354813
8031	Hypermethylated in treated	TNFRSF6B	NM_003823	chr20	63696650	63698698	+	chr20	63696968	63697297	482	0.24327	0.00354813
8040	Hypermethylated in treated	CBR1	NM_001757	chr21	36069923	36073177	+	chr21	36068833	36069282	-865	0.205846	0.00354813
8354	Hypermethylated in treated	SLC25A25	NM_052901	chr9	128098481	128109258	+	chr9	128098197	128098422	-171	0.436311	0.00354813
15279	Hypomethylated in treated	DGKD	NM_003648	chr2	233388153	233472097	+	chr2	233386563	233386810	-1467	-0.134636	0.00354813
7611	Hypermethylated in treated	NDFIP2	NM_019080	chr13	79481123	79556077	+	chr13	79481649	79481786	595	0.317316	0.00363078
7993	Hypermethylated in treated	SNAP25	NM_130811	chr20	10218828	10307418	+	chr20	10217838	10218089	-864	0.23899	0.00363078
8382	Hypermethylated in treated	VCX2	NM_016378	chrX	8169943	8171267	-	chrX	8171232	8171383	-1365	0.488578	0.00363078
15262	Hypomethylated in treated	NAGK	NM_017567	chr2	71068277	71078868	+	chr2	71067481	71067639	-717	-0.426358	0.00363078
15323	Hypomethylated in treated	COL6A1	NM_001848	chr21	45981748	46005049	+	chr21	45980199	45980533	-1382	-0.359612	0.00363078
15464	Hypomethylated in treated	FERD3L	NM_152898	chr7	19144781	19145421	-	chr7	19144681	19144840	21	-0.291543	0.00363078
7443	Hypermethylated in treated	LOC100130331	NR_027247	chr1	237862174	237928319	+	chr1	237862025	237862478	78	0.230902	0.00371535
7580	Hypermethylated in treated	GLI1|GLI1	NM_001167609|NM_001160045	chr12|chr12	57460150|57460134	57472264|57472264	+|+	chr12	57460309	57460542	276|292	0.314825	0.00371535
8083	Hypermethylated in treated	RPL15	NM_002948	chr3	23916803	23920856	+	chr3	23917452	23917883	865	0.294888	0.00371535
8390	Hypermethylated in treated	MID1IP1	NM_001098791	chrX	38801431	38806530	+	chrX	38800990	38801119	-377	0.300325	0.00371535
14860	Hypomethylated in treated	TEX35	NM_032126	chr1	178513076	178522654	+	chr1	178513238	178513595	340	-0.239336	0.00371535
14960	Hypomethylated in treated	CD3E	NM_000733	chr11	118304579	118316175	+	chr11	118304804	118305063	355	-0.162417	0.00371535
15044	Hypomethylated in treated	NRXN3	NM_138970	chr14	79279338	79868290	+	chr14	79277475	79277838	-1682	-0.234358	0.00371535
15331	Hypomethylated in treated	CABIN1	NM_012295	chr22	24011314	24178628	+	chr22	24010491	24011065	-536	-0.233237	0.00371535
15541	Hypomethylated in treated	SURF2	NM_017503	chr9	133356544	133361165	+	chr9	133356200	133356357	-266	-0.190214	0.00371535
8141	Hypermethylated in treated	CXCL2	NM_002089	chr4	74097036	74099280	-	chr4	74098770	74099221	-1960	0.229851	0.00380189
8215	Hypermethylated in treated	GUCA1A	NM_000409	chr6	42155376	42180083	+	chr6	42155167	42155438	-74	0.53716	0.00380189
8407	Hypermethylated in treated	NDUFA1|RNF113A	NM_004541|NM_006978	chrX|chrX	119871770|119870531	119876666|119871828	+|-	chrX	119871880	119872029	184|-1423	0.437721	0.00380189
15031	Hypomethylated in treated	RNASE2	NM_002934	chr14	20955470	20956435	+	chr14	20954992	20955151	-398	-0.151199	0.00380189
15149	Hypomethylated in treated	CDK3	NM_001258	chr17	76000905	76005999	+	chr17	76000550	76000813	-223	-0.122135	0.00380189
15235	Hypomethylated in treated	BAX	NM_138763	chr19	48954859	48961798	+	chr19	48954704	48954943	-35	-0.282559	0.00380189
15245	Hypomethylated in treated	U2AF2	NM_007279	chr19	55654049	55674716	+	chr19	55653961	55654308	85	-0.438271	0.00380189
15261	Hypomethylated in treated	ATP6V1B1	NM_001692	chr2	70935867	70965431	+	chr2	70936276	70936509	525	-0.235717	0.00380189
15370	Hypomethylated in treated	KCNAB1	NM_172159	chr3	156290986	156539138	+	chr3	156290466	156290903	-302	-0.391906	0.00380189
7423	Hypermethylated in treated	NHLH1	NM_005598	chr1	160367070	160372848	+	chr1	160366453	160366880	-404	0.257257	0.00389045
7590	Hypermethylated in treated	OAS3	NM_006187	chr12	112938432	112973249	+	chr12	112937127	112937476	-1130	0.291067	0.00389045
7608	Hypermethylated in treated	SETDB2	NM_031915	chr13	49444292	49495003	+	chr13	49444279	49444414	54	0.471298	0.00389045
7621	Hypermethylated in treated	MMP14	NM_004995	chr14	22836532	22847599	+	chr14	22836446	22836705	44	0.229871	0.00389045
15034	Hypomethylated in treated	THTPA	NM_024328	chr14	23555981	23559581	+	chr14	23556297	23556538	437	-0.176576	0.00389045
15447	Hypomethylated in treated	AIM1	NM_001624	chr6	106511854	106570449	+	chr6	106511419	106511670	-310	-0.145258	0.00389045
7485	Hypermethylated in treated	TSPAN4|TSPAN4|TSPAN4	NM_001025234|NM_001025238|NM_001025236	chr11|chr11|chr11	844080|842823|842940	867116|867116|867116	+|+|+	chr11	842120	842481	-1780|-523|-640	0.341616	0.00398107
7900	Hypermethylated in treated	PPFIA3	NM_003660	chr19	49119388	49151030	+	chr19	49117957	49118107	-1356	0.230258	0.00398107
7977	Hypermethylated in treated	EIF4E2	NM_004846	chr2	232550586	232569211	+	chr2	232550377	232550905	55	0.431881	0.00398107
14876	Hypomethylated in treated	NLRP3|NLRP3	NM_183395|NM_001127461	chr1|chr1	247418048|247416155	247449104|247449104	+|+	chr1	247416291	247416860	-1472|421	-0.308469	0.00398107
14983	Hypomethylated in treated	GRASP	NM_181711	chr12	52006944	52015889	+	chr12	52005873	52006036	-990	-0.421331	0.00398107
15090	Hypomethylated in treated	TMEM204	NM_024600	chr16	1533656	1555580	+	chr16	1534390	1534753	916	-0.222584	0.00398107
7512	Hypermethylated in treated	SCGB1D1	NM_006552	chr11	62190237	62193537	+	chr11	62190220	62190353	49	0.312131	0.0040738
7610	Hypermethylated in treated	SUGT1	NM_006704	chr13	52652690	52688354	+	chr13	52652555	52652828	2	0.302958	0.0040738
7625	Hypermethylated in treated	PNN	NM_002687	chr14	39175182	39183218	+	chr14	39174107	39174368	-944	0.2195	0.0040738
7880	Hypermethylated in treated	ACP7	NM_001004318	chr19	39084304	39111488	+	chr19	39084314	39084584	145	0.199566	0.0040738
7925	Hypermethylated in treated	ZNF446	NM_017908	chr19	58476163	58481234	+	chr19	58475988	58476139	-99	0.304942	0.0040738
15128	Hypomethylated in treated	SENP3	NM_015670	chr17	7561991	7571969	+	chr17	7561161	7561326	-747	-0.259899	0.0040738
15211	Hypomethylated in treated	SPINT2	NM_001166103	chr19	38264457	38292614	+	chr19	38263920	38264053	-471	-0.193834	0.0040738
15397	Hypomethylated in treated	FAT4	NM_024582	chr4	125316411	125492932	+	chr4	125315601	125316049	-586	-0.275204	0.0040738
15448	Hypomethylated in treated	C6orf203	NM_001142470	chr6	107028171	107051586	+	chr6	107028141	107028687	243	-0.239901	0.0040738
15545	Hypomethylated in treated	CCDC183	NM_001039374	chr9	136796337	136807741	+	chr9	136794808	136795057	-1405	-0.136619	0.0040738
7560	Hypermethylated in treated	PPFIBP1	NM_003622	chr12	27524111	27695564	+	chr12	27523820	27523969	-217	0.309992	0.00416869
7572	Hypermethylated in treated	HOXC5	NM_018953	chr12	54033047	54035360	+	chr12	54032927	54033581	207	0.342	0.00416869
7740	Hypermethylated in treated	GUCY2D	NM_000180	chr17	8002669	8020340	+	chr17	8003259	8003504	713	0.21658	0.00416869
8314	Hypermethylated in treated	ZNF623	NM_014789	chr8	143649783	143653730	+	chr8	143650012	143650263	355	0.372857	0.00416869
8318	Hypermethylated in treated	MIR937	NR_030633	chr8	143812956	143813042	-	chr8	143812624	143813175	56	0.410715	0.00416869
15198	Hypomethylated in treated	GCDH	NM_013976	chr19	12891128	12899999	+	chr19	12890757	12890992	-254	-0.222006	0.00416869
15220	Hypomethylated in treated	CIC	NM_015125	chr19	42284664	42295796	+	chr19	42283246	42283577	-1252	-0.340157	0.00416869
15263	Hypomethylated in treated	MTHFD2	NM_006636	chr2	74198562	74215297	+	chr2	74198816	74199070	381	-0.122058	0.00416869
7457	Hypermethylated in treated	ADO	NM_032804	chr10	62804755	62808479	+	chr10	62805290	62805533	657	0.262259	0.0042658
7506	Hypermethylated in treated	MADD|MADD|MADD	NM_130472|NM_130470|NM_130476	chr11|chr11|chr11	47269647|47269375|47270119	47330031|47330031|47330031	+|+|+	chr11	47267988	47268259	-1523|-1251|-1995	0.123219	0.0042658
8089	Hypermethylated in treated	KLHL40	NM_152393	chr3	42685518	42692446	+	chr3	42683600	42683737	-1850	0.624165	0.0042658
15166	Hypomethylated in treated	TNFRSF11A	NM_003839	chr18	62325286	62387710	+	chr18	62324410	62324651	-756	-0.280771	0.0042658
15288	Hypomethylated in treated	SNRPB2	NM_198220	chr20	16729963	16741772	+	chr20	16729348	16729592	-493	-0.444769	0.0042658
15536	Hypomethylated in treated	URM1	NM_030914	chr9	128371318	128392016	+	chr9	128369342	128369624	-1835	-0.643461	0.0042658
7607	Hypermethylated in treated	MLNR	NM_001507	chr13	49220337	49222377	+	chr13	49219823	49221086	117	0.351999	0.00436516
8228	Hypermethylated in treated	GINM1	NM_138785	chr6	149566391	149590931	+	chr6	149566372	149566501	45	0.141043	0.00436516
15124	Hypomethylated in treated	OR1G1	NM_003555	chr17	3126609	3127551	-	chr17	3128365	3128608	-1877	-0.258059	0.00436516
15259	Hypomethylated in treated	UGP2|UGP2	NM_006759|NM_001001521	chr2|chr2	63841879|63840963	63891562|63891562	+|+	chr2	63841296	63841635	-413|503	-0.421405	0.00436516
15305	Hypomethylated in treated	FAM217B	NM_022106	chr20	59940388	59948647	+	chr20	59940668	59940833	362	-0.314141	0.00436516
15357	Hypomethylated in treated	CYB561D2	NM_007022	chr3	50350694	50354065	+	chr3	50351441	50351576	814	-0.296791	0.00436516
15414	Hypomethylated in treated	TMCO6	NM_018502	chr5	140639426	140645408	+	chr5	140639736	140640072	478	-0.41308	0.00436516
7583	Hypermethylated in treated	MON2	NM_015026	chr12	62466816	62597583	+	chr12	62466746	62466999	56	0.13346	0.00446684
8298	Hypermethylated in treated	ZBTB10	NM_023929	chr8	80486212	80526265	+	chr8	80485397	80485828	-600	0.122502	0.00446684
8419	Hypermethylated in treated	ZFP92	NM_001136273	chrX	153418322	153421628	+	chrX	153417924	153418057	-332	0.268257	0.00446684
15092	Hypomethylated in treated	PRSS21	NM_144957	chr16	2817162	2821722	+	chr16	2817547	2817785	504	-0.333955	0.00446684
7535	Hypermethylated in treated	PIWIL4	NM_152431	chr11	94567307	94621421	+	chr11	94567434	94567669	245	0.169502	0.00457088
7916	Hypermethylated in treated	NAT14	NM_020378	chr19	55485189	55487568	+	chr19	55485218	55485563	201	0.376075	0.00457088
14830	Hypomethylated in treated	GJA4	NM_002060	chr1	34792997	34795747	+	chr1	34792462	34792731	-401	-0.423509	0.00457088
15062	Hypomethylated in treated	ULK4P2|ULK4P3|ULK4P1	NR_027470|NR_026859|NR_026858	chr15|chr15|chr15	30103546|30103731|30103546	30131734|30131745|30131734	+|+|+	chr15	30103626	30103959	246|61|246	-0.246238	0.00457088
15409	Hypomethylated in treated	POLR3G	NM_006467	chr5	90474863	90514552	+	chr5	90473742	90473883	-1051	-0.174418	0.00457088
15428	Hypomethylated in treated	BTN3A2	NM_007047	chr6	26365158	26378320	+	chr6	26364298	26364551	-734	-0.13839	0.00457088
15446	Hypomethylated in treated	RIPPLY2	NM_001009994	chr6	83853265	83857516	+	chr6	83853664	83853823	479	-0.314606	0.00457088
7435	Hypermethylated in treated	IL24	NM_006850	chr1	206897442	206904139	+	chr1	206897278	206897507	-50	0.298499	0.00467735
7470	Hypermethylated in treated	ELOVL3	NM_152310	chr10	102226277	102229587	+	chr10	102226866	102227005	659	0.251201	0.00467735
7754	Hypermethylated in treated	FNDC8	NM_017559	chr17	35121611	35130732	+	chr17	35121620	35121757	77	0.315354	0.00467735
7773	Hypermethylated in treated	RUNDC3A	NM_001144825	chr17	44308558	44318670	+	chr17	44307995	44308144	-488	0.429999	0.00467735
7881	Hypermethylated in treated	DLL3	NM_203486	chr19	39498916	39508481	+	chr19	39498174	39498521	-568	0.163882	0.00467735
15074	Hypomethylated in treated	ARIH1	NM_005744	chr15	72474325	72586555	+	chr15	72474537	72474884	385	-0.274241	0.00467735
15273	Hypomethylated in treated	DNAJC10	NM_018981	chr2	182716040	182780023	+	chr2	182716553	182716896	684	-0.377251	0.00467735
7481	Hypermethylated in treated	IFITM5	NM_001025295	chr11	298200	299526	-	chr11	299240	300465	-1652	0.287361	0.0047863
7816	Hypermethylated in treated	ELP2	NM_018255	chr18	36129873	36174726	+	chr18	36129686	36130055	-3	0.156503	0.0047863
8242	Hypermethylated in treated	TTYH3	NM_025250	chr7	2631968	2664802	+	chr7	2630451	2630802	-1342	0.142141	0.0047863
15105	Hypomethylated in treated	TRIM72	NM_001008274	chr16	31214020	31225189	+	chr16	31213949	31214802	356	-0.285695	0.0047863
15191	Hypomethylated in treated	PDE4A	NM_006202	chr19	10452956	10469631	+	chr19	10451040	10451490	-1691	-0.463913	0.0047863
15246	Hypomethylated in treated	MIMT1	NR_024059	chr19	56840901	56848554	+	chr19	56839383	56839816	-1301	-0.0685143	0.0047863
15293	Hypomethylated in treated	DEFB118	NM_054112	chr20	31368617	31373902	+	chr20	31367725	31368540	-485	-0.388565	0.0047863
15573	Hypomethylated in treated	RGAG1	NM_020769	chrX	110419056	110456334	+	chrX	110419017	110419168	36	-0.393537	0.0047863
8048	Hypermethylated in treated	PWP2	NM_005049	chr21	44107326	44131181	+	chr21	44107455	44107586	194	0.270925	0.00501187
8133	Hypermethylated in treated	SLIT2	NM_004787	chr4	20251904	20620561	+	chr4	20251172	20251627	-504	0.239324	0.00501187
8291	Hypermethylated in treated	GINS4	NM_032336	chr8	41529205	41545046	+	chr8	41529044	41529602	118	0.136796	0.00501187
15028	Hypomethylated in treated	GRK1	NM_002929	chr13	113667281	113735664	+	chr13	113667450	113667607	247	-0.430866	0.00501187
15559	Hypomethylated in treated	HDAC6	NM_006044	chrX	48802079	48824970	+	chrX	48800532	48800763	-1431	-0.23189	0.00501187
15206	Hypomethylated in treated	ZNF486	NM_052852	chr19	20167213	20200490	+	chr19	20167548	20167683	403	-0.186386	0.00512861
15312	Hypomethylated in treated	LIME1	NM_017806	chr20	63736459	63739107	+	chr20	63734530	63734677	-1855	-0.154521	0.00512861
7786	Hypermethylated in treated	ARMC7	NM_024585	chr17	75109951	75130265	+	chr17	75108897	75109245	-880	0.239405	0.00524807
8069	Hypermethylated in treated	KDELR3	NM_006855	chr22	38468061	38483447	+	chr22	38467352	38467589	-591	0.389785	0.00524807
8091	Hypermethylated in treated	TMIE	NM_147196	chr3	46701332	46710923	+	chr3	46700060	46700215	-1194	0.333251	0.00524807
8198	Hypermethylated in treated	HIST1H2BI	NM_003525	chr6	26272975	26273412	+	chr6	26273235	26273511	398	0.560318	0.00524807
8268	Hypermethylated in treated	PCOLCE	NM_002593	chr7	100602258	100608176	+	chr7	100602218	100602447	74	0.307781	0.00524807
15025	Hypomethylated in treated	CARKD	NM_018210	chr13	110615583	110639995	+	chr13	110614994	110615125	-523	-0.0904904	0.00524807
15135	Hypomethylated in treated	FOXN1	NM_003593	chr17	28523940	28538157	+	chr17	28523230	28523599	-526	-0.144556	0.00524807
15472	Hypomethylated in treated	ZMIZ2	NM_174929	chr7	44756187	44769880	+	chr7	44755772	44755999	-301	-0.191978	0.00524807
7890	Hypermethylated in treated	APOE	NM_000041	chr19	44905748	44909395	+	chr19	44905559	44905708	-114	0.118843	0.00537032
8412	Hypermethylated in treated	STK26|STK26	NM_001042453|NM_001042452	chrX|chrX	132023216|132023607	132075943|132075943	+|+	chrX	132023289	132023450	154|-237	0.406427	0.00537032
15097	Hypomethylated in treated	PRM3	NM_021247	chr16	11273198	11273595	-	chr16	11273534	11273759	-448	-0.352656	0.00537032
15339	Hypomethylated in treated	CSF2RB	NM_000395	chr22	36913632	36940437	+	chr22	36913822	36914067	312	-0.132152	0.00537032
15433	Hypomethylated in treated	C4B	NM_001002029	chr6	32014794	32035418	+	chr6	32014607	32015058	38	-0.452705	0.00537032
15539	Hypomethylated in treated	POMT1	NM_007171	chr9	131502901	131523806	+	chr9	131500985	131501110	-1853	-0.320223	0.00537032
8092	Hypermethylated in treated	TMEM89	NM_001008269	chr3	48620841	48621756	-	chr3	48621667	48622009	-997	0.316043	0.00549541
8264	Hypermethylated in treated	NPTX2	NM_002523	chr7	98617284	98629869	+	chr7	98617789	98618218	720	0.343918	0.00549541
15043	Hypomethylated in treated	BATF	NM_006399	chr14	75522440	75546991	+	chr14	75522401	75522762	142	-0.162055	0.00549541
15450	Hypomethylated in treated	SLC35F1	NM_001029858	chr6	117907525	118317676	+	chr6	117907033	117907160	-429	-0.116483	0.00549541
7766	Hypermethylated in treated	FKBP10	NM_021939	chr17	41812709	41823217	+	chr17	41812775	41812942	149	0.29511	0.00562341
8175	Hypermethylated in treated	SLC35A4	NM_080670	chr5	140564564	140569104	+	chr5	140564166	140564500	-231	0.424352	0.00562341
8430	Hypermethylated in treated	TBL1Y	NM_134259	chrY	6910685	7091683	+	chrY	6909498	6910268	-802	0.422037	0.00562341
14891	Hypomethylated in treated	LZTS2	NM_032429	chr10	100997065	101007836	+	chr10	100995592	100995921	-1309	-0.460143	0.00562341
14974	Hypomethylated in treated	C12orf57	NM_138425	chr12	6943816	6946003	+	chr12	6943400	6943561	-336	-0.291779	0.00562341
15020	Hypomethylated in treated	SERPINE3	NM_001101320	chr13	51341031	51362103	+	chr13	51340140	51340276	-823	-0.0890845	0.00562341
15048	Hypomethylated in treated	SLC25A47	NM_207117	chr14	100323341	100330378	+	chr14	100323297	100323546	81	-0.109677	0.00562341
15132	Hypomethylated in treated	ALKBH5	NM_017758	chr17	18183552	18209953	+	chr17	18182279	18182672	-1076	-0.215957	0.00562341
15253	Hypomethylated in treated	TMEM214	NM_001083590	chr2	27032905	27041697	+	chr2	27031418	27031669	-1361	-0.623171	0.00562341
7516	Hypermethylated in treated	SPDYC	NM_001008778	chr11	65170235	65173217	+	chr11	65169644	65169894	-466	0.217814	0.0057544
7666	Hypermethylated in treated	TPSB2	NM_024164	chr16	1228335	1230184	-	chr16	1229777	1230148	-1627	0.407356	0.0057544
7704	Hypermethylated in treated	VPS4A	NM_013245	chr16	69311383	69325043	+	chr16	69310604	69311451	-355	0.294425	0.0057544
7802	Hypermethylated in treated	SLC25A10	NM_012140	chr17	81712235	81721016	+	chr17	81712509	81712872	455	0.134938	0.0057544
8415	Hypermethylated in treated	AFF2	NM_002025	chrX	148500618	149000663	+	chrX	148499386	148499637	-1106	0.0851969	0.0057544
14958	Hypomethylated in treated	REXO2	NM_015523	chr11	114439385	114450278	+	chr11	114439638	114439769	319	-0.174986	0.0057544
14988	Hypomethylated in treated	NXPH4	NM_007224	chr12	57216794	57226449	+	chr12	57215378	57215607	-1302	-0.0949418	0.0057544
15068	Hypomethylated in treated	CHAC1	NM_024111	chr15	40953437	40956519	+	chr15	40953720	40953966	406	-0.27842	0.0057544
15122	Hypomethylated in treated	KIF22	NM_007317	chr16	29790712	29805385	+	chr16	29791224	29791373	586	-0.558121	0.0057544
15499	Hypomethylated in treated	TACC1	NM_001146216	chr8	38728185	38853028	+	chr8	38727960	38728098	-156	-0.118908	0.0057544
7412	Hypermethylated in treated	SCNM1	NM_024041	chr1	151166021	151170297	+	chr1	151166395	151166548	451	0.179376	0.00588844
7498	Hypermethylated in treated	TAF10	NM_006284	chr11	6610816	6612244	-	chr11	6612328	6612653	-1674	0.127681	0.00588844
7600	Hypermethylated in treated	EP400NL	NR_003290	chr12	132084282	132126340	+	chr12	132084521	132084655	306	0.240053	0.00588844
7696	Hypermethylated in treated	MT1E	NM_175617	chr16	56625672	56627113	+	chr16	56625858	56626125	320	0.30284	0.00588844
8129	Hypermethylated in treated	TADA2B	NM_152293	chr4	7043428	7057950	+	chr4	7043312	7043543	0	0.0417573	0.00588844
8254	Hypermethylated in treated	UPP1	NM_003364	chr7	48089211	48108733	+	chr7	48088517	48088666	-619	0.348623	0.00588844
8272	Hypermethylated in treated	MIR671	NR_030407	chr7	151238420	151238538	+	chr7	151237343	151237496	-1000	0.24255	0.00588844
8312	Hypermethylated in treated	GPIHBP1	NM_178172	chr8	143213192	143217170	+	chr8	143212597	143212728	-530	0.341574	0.00588844
14991	Hypomethylated in treated	AGAP2-AS1	NR_027032	chr12	57726239	57728356	+	chr12	57726349	57726498	185	-0.368442	0.00588844
15343	Hypomethylated in treated	TTC38	NM_017931	chr22	46267963	46294008	+	chr22	46267124	46268172	-315	-0.358268	0.00588844
15388	Hypomethylated in treated	SH3BP2	NM_001145855	chr4	2812218	2841096	+	chr4	2812402	2812545	256	-0.109756	0.00588844
7975	Hypermethylated in treated	TMEM198	NM_001005209	chr2	219544005	219550596	+	chr2	219544352	219544491	417	0.35333	0.0060256
8111	Hypermethylated in treated	TSC22D2	NM_014779	chr3	150408334	150460118	+	chr3	150408367	150409710	704	0.303097	0.0060256
8290	Hypermethylated in treated	RNF5P1	NR_003129	chr8	38600174	38601257	-	chr8	38601977	38602230	-1930	0.162387	0.0060256
8321	Hypermethylated in treated	PPP1R16A	NM_032902	chr8	144496725	144502121	+	chr8	144497134	144497279	481	0.309643	0.0060256
8366	Hypermethylated in treated	PAEP	NM_002571	chr9	135561755	135566776	+	chr9	135561323	135561490	-349	0.125677	0.0060256
15067	Hypomethylated in treated	DISP2	NM_033510	chr15	40358234	40371056	+	chr15	40357717	40358064	-344	-0.378136	0.0060256
7758	Hypermethylated in treated	SNORA21	NR_002576	chr17	38852862	38852995	-	chr17	38854534	38854879	-1844	0.318603	0.00616595
8094	Hypermethylated in treated	FLNB	NM_001164319	chr3	58008399	58172255	+	chr3	58008533	58008780	257	0.36572	0.00616595
8167	Hypermethylated in treated	EPB41L4A-AS2	NR_027706	chr5	112419582	112420981	+	chr5	112418828	112419353	-492	0.239837	0.00616595
14932	Hypomethylated in treated	RARRES3	NM_004585	chr11	63536800	63546458	+	chr11	63535072	63535323	-1602	-0.540511	0.00616595
15153	Hypomethylated in treated	SLC26A11	NM_001166349	chr17	80220400	80253509	+	chr17	80220222	80220371	-104	-0.306949	0.00616595
15197	Hypomethylated in treated	MAST1	NM_014975	chr19	12838444	12874952	+	chr19	12837980	12838229	-340	-0.331473	0.00616595
7421	Hypermethylated in treated	DUSP23	NM_017823	chr1	159780945	159782546	+	chr1	159781052	159781291	227	0.263342	0.00630957
7809	Hypermethylated in treated	MYL12B|MYL12B|MYL12B	NM_001144944|NM_001144945|NM_033546	chr18|chr18|chr18	3262612|3262718|3262112	3278284|3278284|3278284	+|+|+	chr18	3262496	3262621	-54|-160|446	0.246457	0.00630957
8056	Hypermethylated in treated	MED15	NM_015889	chr22	20507541	20587632	+	chr22	20507559	20507832	155	0.243956	0.00630957
8216	Hypermethylated in treated	CUL9	NM_015089	chr6	43182183	43224587	+	chr6	43180851	43181294	-1111	0.154205	0.00630957
14843	Hypomethylated in treated	AMPD2	NM_203404	chr1	109625426	109632055	+	chr1	109624511	109624951	-695	-0.4497	0.00630957
14915	Hypomethylated in treated	PRKCDBP	NM_145040	chr11	6318945	6320510	-	chr11	6319729	6319980	-909	-0.605711	0.00630957
7456	Hypermethylated in treated	CHAT	NM_020986	chr10	49613107	49665104	+	chr10	49611472	49612027	-1357	0.45494	0.00645654
7460	Hypermethylated in treated	SLC29A3	NM_018344	chr10	71319252	71363390	+	chr10	71318013	71318376	-1058	0.285463	0.00645654
7955	Hypermethylated in treated	ZAP70	NM_207519	chr2	97734405	97739860	+	chr2	97733974	97734321	-257	0.175254	0.00645654
8107	Hypermethylated in treated	EFCC1	NM_024768	chr3	129001628	129040742	+	chr3	129001618	129001777	70	0.0631639	0.00645654
15427	Hypomethylated in treated	NOL7	NM_016167	chr6	13615326	13621712	+	chr6	13614787	13615150	-358	-0.542279	0.00645654
15575	Hypomethylated in treated	CT45A1	NM_001017417	chrX	135713452	135723246	+	chrX	135713876	135714051	512	-0.383715	0.00645654
7426	Hypermethylated in treated	BRINP2	NM_021165	chr1	177171387	177282422	+	chr1	177171117	177171266	-195	0.147981	0.00660693
7474	Hypermethylated in treated	TACC2	NM_206860	chr10	122163425	122254545	+	chr10	122162910	122163449	-245	0.218845	0.00660693
14850	Hypomethylated in treated	S100A3	NM_002960	chr1	153547332	153549258	-	chr1	153548872	153549113	-1660	-0.223789	0.00660693
14921	Hypomethylated in treated	TCP11L1	NM_001145541	chr11	33040014	33073563	+	chr11	33040176	33040435	292	-0.384201	0.00660693
7362	Hypermethylated in treated	TTLL10	NM_153254	chr1	1179696	1185863	+	chr1	1178572	1179125	-848	0.20622	0.00676083
7756	Hypermethylated in treated	SOCS7	NM_014598	chr17	38352123	38405593	+	chr17	38351583	38351850	-407	0.355117	0.00676083
8108	Hypermethylated in treated	UBA5	NM_024818	chr3	132659496	132678107	+	chr3	132660578	132660721	1154	0.0973424	0.00676083
14824	Hypomethylated in treated	STX12	NM_177424	chr1	27773182	27824452	+	chr1	27773466	27773611	356	-0.119646	0.00676083
15196	Hypomethylated in treated	WDR83	NM_032332	chr19	12669702	12675832	+	chr19	12668335	12668572	-1248	-0.207926	0.00676083
15201	Hypomethylated in treated	TPM4	NM_001145160	chr19	16067506	16103003	+	chr19	16066566	16066891	-778	-0.147653	0.00676083
15425	Hypomethylated in treated	GCNT2	NM_145655	chr6	10585759	10629368	+	chr6	10584043	10584182	-1647	-0.379469	0.00676083
14892	Hypomethylated in treated	SFXN3	NM_030971	chr10	101031238	101041241	+	chr10	101031598	101031747	434	-0.40465	0.00691831
15126	Hypomethylated in treated	SPNS2	NM_001124758	chr17	4498833	4539933	+	chr17	4497094	4497357	-1607	-0.0830852	0.00691831
15439	Hypomethylated in treated	DAAM2	NM_015345	chr6	39792996	39904877	+	chr6	39792611	39793258	-62	-0.340767	0.00691831
8090	Hypermethylated in treated	EXOSC7	NM_015004	chr3	44976248	45011470	+	chr3	44975612	44975965	-460	0.486431	0.00707946
8403	Hypermethylated in treated	TIMM8A	NM_001145951	chrX	101348037	101348720	-	chrX	101348117	101348360	-201	0.351921	0.00707946
14853	Hypomethylated in treated	LAMTOR2	NM_001145264	chr1	156054725	156058510	+	chr1	156054162	156054421	-433	-0.250852	0.00707946
15443	Hypomethylated in treated	HSP90AB1	NM_007355	chr6	44246957	44253888	+	chr6	44246101	44246256	-779	-0.121507	0.00707946
8161	Hypermethylated in treated	SV2C	NM_014979	chr5	76083413	76333956	+	chr5	76083837	76083976	493	0.0986115	0.00724436
8185	Hypermethylated in treated	CPLX2	NM_001008220	chr5	175871497	175884020	+	chr5	175871480	175872007	247	0.338698	0.0074131
8417	Hypermethylated in treated	GPR50	NM_004224	chrX	151176583	151181465	+	chrX	151176264	151176497	-203	0.212646	0.0074131
14833	Hypomethylated in treated	PPIE	NM_203456	chr1	39738844	39763914	+	chr1	39737085	39737630	-1486	-0.331889	0.0074131
14918	Hypomethylated in treated	SAA1	NM_199161	chr11	18266224	18269976	+	chr11	18266103	18266240	-52	-0.555964	0.0074131
14935	Hypomethylated in treated	GPR137	NM_020155	chr11	64286109	64289500	+	chr11	64286441	64286568	395	-0.265839	0.0074131
15249	Hypomethylated in treated	TRAPPC12	NM_016030	chr2	3379674	3479571	+	chr2	3379785	3380058	248	-0.285115	0.0074131
15423	Hypomethylated in treated	CDHR2	NM_017675	chr5	176549341	176595768	+	chr5	176547815	176547954	-1457	-0.0482167	0.0074131
7463	Hypermethylated in treated	SH2D4B	NM_207372	chr10	80537901	80646560	+	chr10	80537861	80538000	29	0.157061	0.00758578
7759	Hypermethylated in treated	GRB7	NM_001030002	chr17	39738322	39747285	+	chr17	39738590	39738731	338	0.550193	0.00758578
7918	Hypermethylated in treated	ZNF580|ZNF581|ZNF580	NM_016202|NM_016535|NM_001163423	chr19|chr19|chr19	55642051|55643619|55642096	55643470|55645623|55643470	+|+|+	chr19	55642485	55642639	511|-1057|466	0.168583	0.00758578
7953	Hypermethylated in treated	PROM2	NM_144707	chr2	95274452	95291307	+	chr2	95272313	95273264	-1664	0.377782	0.00758578
7968	Hypermethylated in treated	RAPGEF4	NM_001100397	chr2	172821586	173052892	+	chr2	172821847	172821999	337	0.290611	0.00758578
8334	Hypermethylated in treated	NPR2	NM_003995	chr9	35792408	35809731	+	chr9	35791288	35791437	-1046	0.222068	0.00758578
8418	Hypermethylated in treated	MAGEA4	NM_001011550	chrX	151918287	151925170	+	chrX	151918393	151918540	179	0.519847	0.00758578
14821	Hypomethylated in treated	LOC284632	NR_027087	chr1	24200239	24211690	+	chr1	24199283	24199638	-779	-0.253288	0.00758578
14828	Hypomethylated in treated	ZCCHC17	NM_016505	chr1	31296981	31364953	+	chr1	31296569	31296828	-283	-0.106623	0.00758578
15163	Hypomethylated in treated	MIB1	NM_020774	chr18	21741328	21870957	+	chr18	21740543	21740797	-658	-0.210886	0.00758578
15277	Hypomethylated in treated	WNT10A	NM_025216	chr2	218880532	218893929	+	chr2	218879411	218879556	-1048	-0.403252	0.00758578
15365	Hypomethylated in treated	ABTB1	NM_172027	chr3	127672937	127680926	+	chr3	127671719	127671862	-1147	-0.135621	0.00758578
7465	Hypermethylated in treated	ZFYVE27	NM_001002262	chr10	97737120	97760907	+	chr10	97737324	97737463	274	0.203367	0.00776247
7587	Hypermethylated in treated	RFX4	NM_213594	chr12	106582906	106762804	+	chr12	106583483	106583708	690	0.344687	0.00776247
7939	Hypermethylated in treated	PLB1	NM_153021	chr2	28496070	28643787	+	chr2	28495098	28495225	-908	0.445664	0.00776247
8421	Hypermethylated in treated	AVPR2	NM_000054	chrX	153905074	153907166	+	chrX	153904474	153904615	-530	0.0874691	0.00776247
14945	Hypomethylated in treated	P2RY2|P2RY2	NM_176071|NM_176072	chr11|chr11	73218456|73218297	73242427|73242427	+|+	chr11	73216595	73217448	-1434|-1275	-0.391587	0.00776247
14955	Hypomethylated in treated	MIR34C|C11orf88|MIR34B	NR_029840|NM_001100388|NR_029839	chr11|chr11|chr11	111513438|111514784|111512937	111513515|111537031|111513021	+|+|+	chr11	111513542	111513689	178|-1168|679	-0.335161	0.00776247
15084	Hypomethylated in treated	PIGQ	NM_148920	chr16	569967	584136	+	chr16	568103	568640	-1595	-0.391613	0.00776247
15569	Hypomethylated in treated	IL1RAPL2	NM_017416	chrX	104566314	105767829	+	chrX	104566281	104566430	42	-0.69553	0.00776247
14849	Hypomethylated in treated	LCE2D	NM_178430	chr1	152663410	152664659	+	chr1	152663181	152663352	-144	-0.418821	0.00794328
15328	Hypomethylated in treated	RANBP1	NM_002882	chr22	20117423	20127357	+	chr22	20116185	20116420	-1121	-0.152911	0.00794328
15488	Hypomethylated in treated	CLEC2L	NM_001080511	chr7	139523927	139544985	+	chr7	139522152	139522311	-1695	-0.333424	0.00794328
7891	Hypermethylated in treated	CLASRP	NM_007056	chr19	45039039	45070956	+	chr19	45039484	45039645	525	0.231241	0.00812831
8088	Hypermethylated in treated	EIF1B	NM_005875	chr3	40309681	40312426	+	chr3	40309697	40309964	149	0.157729	0.00812831
8114	Hypermethylated in treated	POLR2H	NM_006232	chr3	184362982	184368595	+	chr3	184362290	184362719	-478	0.203104	0.00812831
15584	Hypomethylated in treated	ASMTL-AS1	NR_026710	chrY	1400530	1413586	+	chrY	1399989	1400464	-304	-0.385968	0.00812831
7682	Hypermethylated in treated	NOMO3	NM_001004067	chr16	16232531	16294811	+	chr16	16232211	16232840	-5	0.184365	0.00831764
7760	Hypermethylated in treated	RARA	NM_000964	chr17	40309170	40357643	+	chr17	40309154	40309319	66	0.179057	0.00831764
8043	Hypermethylated in treated	SIM2	NM_005069	chr21	36699132	36749917	+	chr21	36699918	36700290	972	0.409846	0.00831764
8348	Hypermethylated in treated	GNG10	NM_001017998	chr9	111661570	111670246	+	chr9	111661590	111661715	82	0.371204	0.00831764
14816	Hypomethylated in treated	CLCN6	NM_001286	chr1	11806095	11843144	+	chr1	11805366	11805613	-605	-0.514574	0.00831764
15230	Hypomethylated in treated	GIPR	NM_000164	chr19	45668243	45683724	+	chr19	45668198	45668449	81	-0.225195	0.00831764
7973	Hypermethylated in treated	BCS1L	NM_001079866	chr2	218659655	218663443	+	chr2	218659164	218659409	-369	0.544564	0.00851138
8017	Hypermethylated in treated	RBM38	NM_017495	chr20	57391397	57409330	+	chr20	57390001	57390340	-1227	0.159406	0.00851138
14986	Hypomethylated in treated	HOXC10	NM_017409	chr12	53985161	53990278	+	chr12	53985332	53985887	449	-0.458627	0.00851138
8153	Hypermethylated in treated	MRPL36|NDUFS6	NM_032479|NM_004553	chr5|chr5	1798384|1801381	1799842|1816051	-|+	chr5	1799886	1800031	-1574|-1423	0.00167416	0.00870964
7510	Hypermethylated in treated	DTX4	NM_015177	chr11	59172338	59208587	+	chr11	59172933	59173292	774	0.26812	0.00891251
8345	Hypermethylated in treated	TMEFF1	NM_003692	chr9	100473237	100577636	+	chr9	100473515	100473646	343	0.0271665	0.00891251
15525	Hypomethylated in treated	CTSL	NM_145918	chr9	87726058	87731469	+	chr9	87725677	87725820	-310	-0.256909	0.00891251
15410	Hypomethylated in treated	CTXN3	NM_001048252	chr5	127649020	127658630	+	chr5	127649027	127649178	82	-0.125888	0.00912011
15565	Hypomethylated in treated	DMRTC1B|DMRTC1	NM_001080851|NM_033053	chrX|chrX	72845041|72845041	72848802|72848802	+|+	chrX	72844957	72845216	45|45	-0.173847	0.00912011
7417	Hypermethylated in treated	EFNA1	NM_182685	chr1	155127872	155134910	+	chr1	155127554	155127681	-254	0.0122867	0.00933254
7585	Hypermethylated in treated	TDG	NM_003211	chr12	103965814	103988878	+	chr12	103965449	103965698	-240	0.297207	0.00933254
7651	Hypermethylated in treated	USP3	NM_006537	chr15	63504510	63594640	+	chr15	63504247	63504404	-184	0.371279	0.00933254
8257	Hypermethylated in treated	KCTD7	NM_001167961	chr7	66628880	66643229	+	chr7	66628435	66628664	-330	0.234238	0.00933254
15562	Hypomethylated in treated	CXorf67	NM_203407	chrX	51406914	51408837	+	chrX	51406717	51406952	-80	-0.269291	0.00933254
15567	Hypomethylated in treated	TCEAL1|TCEAL1	NM_004780|NM_001006640	chrX|chrX	103628963|103628719	103630948|103630948	+|+	chrX	103628634	103628883	-205|39	-0.0325937	0.00933254
7461	Hypermethylated in treated	SAMD8	NM_144660	chr10	75111634	75182123	+	chr10	75112001	75112144	438	0.344361	0.00954993
7472	Hypermethylated in treated	MXI1	NM_001008541	chr10	110210230	110287365	+	chr10	110208562	110208900	-1499	0.125877	0.00954993
7660	Hypermethylated in treated	PRR35	NM_145270	chr16	560421	565529	+	chr16	560300	561043	251	0.190182	0.00954993
8075	Hypermethylated in treated	PRR34-AS1	NR_027034	chr22	46053845	46058522	+	chr22	46053004	46053656	-515	0.273711	0.00954993
8389	Hypermethylated in treated	MAGEB2	NM_002364	chrX	30215557	30220089	+	chrX	30214937	30215086	-545	0.0599059	0.00954993
14832	Hypomethylated in treated	KIAA0754	NM_015038	chr1	39409503	39416482	+	chr1	39408688	39409118	-600	-0.693329	0.00954993
14894	Hypomethylated in treated	WBP1L	NM_001083913	chr10	102743969	102816264	+	chr10	102744290	102744453	403	-0.257837	0.00954993
15046	Hypomethylated in treated	TMEM251|TMEM251	NM_001098621|NM_015676	chr14|chr14	93185029|93184950	93187080|93187086	+|+	chr14	93183934	93184288	-918|-839	-0.196161	0.00954993
15256	Hypomethylated in treated	BRE|BRE	NM_199191|NM_199194	chr2|chr2	27890614|27890614	28338900|28338900	+|+	chr2	27890151	27890398	-340|-340	-0.259216	0.00954993
15375	Hypomethylated in treated	LPP	NM_005578	chr3	188212932	188890671	+	chr3	188212746	188213013	-52	-0.451368	0.00954993
8269	Hypermethylated in treated	UFSP1	NM_001015072	chr7	100888722	100889718	-	chr7	100890260	100890519	-1668	0.194629	0.00977237
14862	Hypomethylated in treated	TROVE2|TROVE2	NM_001042369|NM_001042370	chr1|chr1	193059873|193059873	193091776|193091776	+|+	chr1	193059937	193060104	147|147	-0.00524641	0.00977237
15538	Hypomethylated in treated	PPP2R4|PPP2R4	NM_021131|NM_178003	chr9|chr9	129110948|129111313	129148946|129148946	+|+	chr9	129109706	129110357	-916|-1281	-0.172328	0.00977237
7489	Hypermethylated in treated	LSP1	NM_001013253	chr11	1868672	1892263	+	chr11	1868475	1868720	-74	0.156043	0.01
8004	Hypermethylated in treated	BPI	NM_001725	chr20	38304149	38337503	+	chr20	38303833	38303962	-251	0.542483	0.01
15151	Hypomethylated in treated	SEPT9	NM_001113492	chr17	77287890	77500596	+	chr17	77286700	77288125	-478	-0.287899	0.01
