# Supplementary material for: The Effect of Citalopram on Genome-Wide DNA Methylation of Human Cells
Source: Int J Genomics. 2018 Jul 25;2018:8929057. doi: 10.1155/2018/8929057 (PMC6083487; doi:10.1155/2018/8929057)
Supplement: Supplementary 2 — Supplement 2a: table with a list of significantly differentially methylated peaks (p < 0.01) that lie within 2000 base pairs of the transcription start site of a gene, generated using the initial raw data. All coordinates were transformed from hg18 to hg38, and the genes were reannotated. Peaks were remapped to the latest genome (hg38) and refiltered according to distance from the nearest gene TSS. The “Direction” column indicates which way the differential methylation goes (hypermethylated in treated or hypomethylated). The “Peak differential methylation” column (col M) shows the average difference in methylation level between treated and untreated (positive values are higher methylation in treated compared to untreated; negatives are lower). There are more peaks hypermethylated in treated than hypomethylated (354 hypermethylated peaks versus 272 hypomethylated peaks). Each peak lies within 2000 base pairs of one or more genes. The list of genes is in column C and the distance of their TSS from the middle of the peak is in column L. Positive numbers indicate that the peak middle is upstream of the TSS; negative numbers indicate that the peak middle is downstream. Supplement 2b: means and standard deviations for all of the significant peaks. [file 8929057.f2.zip › Supplement 2b, Means and Standard Deviations.xlsx]

## Sheet: Means and stddevs
Gene	Mean B	Mean C	Mean diff	Standard deviation B	Standard deviation C	Pooled standard deviation
HES4	0.538099	-0.538099	1.0762	0.898493	0.907777	0.903147
TTLL10	0.431801	-0.431801	0.863603	1.32496	0.430251	0.985049
ARHGEF16	0.563756	-0.563756	1.12751	0.889878	0.868708	0.879357
ZBTB48	0.528436	-0.528436	1.05687	1.04663	0.752879	0.911665
CCDC28B	0.821751	-0.821751	1.6435	0.288632	0.625194	0.486917
ZSCAN20	0.558891	-0.558891	1.11778	1.22375	0.255646	0.884003
TOE1	0.730071	-0.730071	1.46014	0.818767	0.480217	0.671189
SCP2	0.707141	-0.707141	1.41428	0.253734	0.967198	0.707055
AHCYL1	0.4859	-0.4859	0.9718	1.03785	0.845329	0.946494
C1orf88	0.530774	-0.530774	1.06155	0.647286	1.11169	0.909625
SCNM1	0.412491	-0.412491	0.824982	0.395695	1.35388	0.997385
LOC100132111	0.748968	-0.748968	1.49794	0.544175	0.721815	0.639196
S100A9	0.69488	-0.69488	1.38976	0.913441	0.465886	0.72506
EFNA1	-0.412915	0.412915	-0.825831	0.953815	1.03862	0.997121
DUSP23	0.483965	-0.483965	0.96793	1.21119	0.574753	0.94798
NHLH1	0.546387	-0.546387	1.09277	0.656274	1.08337	0.895651
FAM5B	0.208357	-0.208357	0.416715	1.0834	1.09362	1.08852
SMG7	0.777549	-0.777549	1.5551	0.767205	0.31249	0.58577
BTG2	0.294052	-0.294052	0.588104	1.4655	0.3048	1.05844
SNRPE	0.599471	-0.599471	1.19894	0.983574	0.674154	0.843179
IL19	0.643931	-0.643931	1.28786	0.935717	0.61684	0.792483
IL24	0.63127	-0.63127	1.26254	0.529442	1.01202	0.807618
HHAT	0.812307	-0.812307	1.62461	0.101919	0.714202	0.510134
KCTD3	0.640868	-0.640868	1.28174	0.968763	0.573903	0.796199
OBSCN	0.489711	-0.489711	0.979422	1.29806	0.309174	0.943544
LOC100130331	0.460274	-0.460274	0.920548	0.996259	0.933762	0.965516
OR2L13	0.87056	-0.87056	1.74112	0.0524768	0.472889	0.336435
OR2T3	0.547343	-0.547343	1.09469	0.621794	1.1021	0.894776
CHAT	0.749199	-0.749199	1.4984	0.683149	0.59111	0.638789
ADO	0.439464	-0.439464	0.878928	0.687613	1.20325	0.979953
KIAA1274	0.774559	-0.774559	1.54912	0.824656	0.141839	0.591682
SLC29A3	0.758354	-0.758354	1.51671	0.848483	0.234037	0.622373
SAMD8	0.772834	-0.772834	1.54567	0.431334	0.722589	0.595056
RPS24	0.794358	-0.794358	1.58872	0.573139	0.527728	0.550901
SH2D4B	0.337872	-0.337872	0.675744	0.479466	1.38839	1.03864
ZFYVE27	0.487203	-0.487203	0.974405	0.66116	1.16223	0.945489
ELOVL3	0.48953	-0.48953	0.979061	0.816519	1.05564	0.943684
MXI1	0.269975	-0.269975	0.539949	0.960123	1.16598	1.06802
TACC2	0.574887	-0.574887	1.14977	1.03375	0.663239	0.86848
PTPRE	0.683873	-0.683873	1.36775	0.890447	0.551414	0.740592
IFITM5	0.561592	-0.561592	1.12318	0.759943	0.988093	0.881431
TSPAN4	0.462374	-0.462374	0.924748	0.777368	1.11997	0.96401
TSPAN4	0.462374	-0.462374	0.924748	0.777368	1.11997	0.96401
TSPAN4	0.462374	-0.462374	0.924748	0.777368	1.11997	0.96401
LOC338651	-0.0765842	0.0765842	-0.153168	0.255968	1.55463	1.11409
LSP1	0.635374	-0.635374	1.27075	0.708474	0.88711	0.802776
KCNQ1	0.515835	-0.515835	1.03167	0.607489	1.15443	0.922427
PHLDA2	0.58661	-0.58661	1.17322	0.941195	0.762769	0.85664
MRGPRG	0.861901	-0.861901	1.7238	0.51787	0.0564954	0.368362
C11orf36	0.861901	-0.861901	1.7238	0.51787	0.0564954	0.368362
OR51G1	-0.488487	0.488487	-0.976973	1.13351	0.706616	0.944495
TAF10	0.28344	-0.28344	0.56688	0.551694	1.39808	1.06278
NLRP14	0.638677	-0.638677	1.27735	0.199707	1.11193	0.798835
MADD	0.61696	-0.61696	1.23392	1.10471	0.371089	0.824039
MADD	0.61696	-0.61696	1.23392	1.10471	0.371089	0.824039
MADD	0.61696	-0.61696	1.23392	1.10471	0.371089	0.824039
OR5F1	0.846527	-0.846527	1.69305	0.589078	0.0562292	0.418434
DTX4	0.518808	-0.518808	1.03762	0.205834	1.28458	0.919923
DAK	0.725423	-0.725423	1.45085	0.797429	0.534218	0.678706
SCGB1D1	0.531585	-0.531585	1.06317	0.602753	1.13532	0.908915
SPDYC	0.502118	-0.502118	1.00424	0.264117	1.29378	0.933711
PRSS23	0.4091	-0.4091	0.818201	1.10503	0.881372	0.999477
PIWIL4	0.312493	-0.312493	0.624986	0.815767	1.2416	1.05049
VWA5A	0.638765	-0.638765	1.27753	0.953709	0.605289	0.798729
PATE3	0.25663	-0.25663	0.51326	0.594212	1.39619	1.07295
APLP2	0.607811	-0.607811	1.21562	0.296129	1.14193	0.834176
CCND2	0.729796	-0.729796	1.45959	0.830925	0.460172	0.671638
GOLT1B	0.663098	-0.663098	1.3262	0.923926	0.57207	0.768408
PPFIBP1	0.224417	-0.224417	0.448835	0.945094	1.20653	1.08372
HOXC5	0.609129	-0.609129	1.21826	0.926933	0.726417	0.832733
GLI1	0.574496	-0.574496	1.14899	0.51338	1.11638	0.868868
GLI1	0.574496	-0.574496	1.14899	0.51338	1.11638	0.868868
MON2	-0.0105179	0.0105179	-0.0210358	0.869752	1.3203	1.11796
TDG	0.692398	-0.692398	1.3848	0.456351	0.92385	0.728613
RFX4	0.606042	-0.606042	1.21208	0.736674	0.924906	0.836104
OAS3	0.728869	-0.728869	1.45774	0.823293	0.477953	0.673145
EP400NL	0.451437	-0.451437	0.902874	0.508738	1.27664	0.971755
MLNR	0.759043	-0.759043	1.51809	0.404133	0.779896	0.621113
SETDB2	0.821779	-0.821779	1.64356	0.371127	0.579918	0.486847
SUGT1	0.734236	-0.734236	1.46847	0.792017	0.505371	0.664338
NDFIP2	0.39104	-0.39104	0.782081	1.37308	0.394862	1.01026
ITGBL1	0.711594	-0.711594	1.42319	0.208778	0.96815	0.700322
TFDP1	0.570068	-0.570068	1.14014	0.663703	1.04142	0.873232
TFDP1	0.570068	-0.570068	1.14014	0.663703	1.04142	0.873232
ZNF828	0.833712	-0.833712	1.66742	0.442199	0.468221	0.455396
OXA1L	0.144855	-0.144855	0.28971	1.34031	0.800392	1.10387
MMP14	0.667616	-0.667616	1.33523	0.769385	0.755589	0.762518
FOXG1	0.305334	-0.305334	0.610668	1.26737	0.783645	1.05364
G2E3	0.862858	-0.862858	1.72572	0.108024	0.504734	0.364984
PNN	0.56733	-0.56733	1.13466	0.496137	1.13501	0.875902
TMEM63C	0.42471	-0.42471	0.84942	0.36024	1.35244	0.989663
FLRT2	0.757053	-0.757053	1.51411	0.743632	0.477101	0.624745
AMN	0.742079	-0.742079	1.48416	0.514243	0.763878	0.651136
DKFZP434L187	0.405309	-0.405309	0.810617	1.14463	0.834866	1.00179
PAK6	0.843761	-0.843761	1.68752	0.536164	0.276999	0.426732
USP3	0.78081	-0.78081	1.56162	0.627325	0.526752	0.579226
TMED3	0.381336	-0.381336	0.762672	1.37551	0.414402	1.01581
C16orf11	0.361685	-0.361685	0.72337	0.241493	1.43151	1.02654
TPSB2	0.652016	-0.652016	1.30403	0.651184	0.894754	0.782504
BAIAP3	0.206146	-0.206146	0.412291	1.42975	0.572998	1.08915
SNORA78	0.699633	-0.699633	1.39927	0.947036	0.366966	0.718172
SNHG9	0.699633	-0.699633	1.39927	0.947036	0.366966	0.718172
SNORA64	0.699633	-0.699633	1.39927	0.947036	0.366966	0.718172
NPW	0.691758	-0.691758	1.38352	0.929738	0.447212	0.729524
C16orf59	0.872404	-0.872404	1.74481	0.427428	0.184501	0.329192
TBC1D24	0.65874	-0.65874	1.31748	0.513538	0.966677	0.774011
NOMO3	0.128021	-0.128021	0.256042	1.33219	0.822256	1.10699
SLC5A11	0.835871	-0.835871	1.67174	0.294895	0.563024	0.449421
PRRT2	0.691056	-0.691056	1.38211	0.349777	0.972101	0.730522
ALDOA	0.735555	-0.735555	1.47111	0.68442	0.639096	0.662146
MIR762	-0.114106	0.114106	-0.228213	1.40018	0.707422	1.10927
CES4	0.119687	-0.119687	0.239373	1.28513	0.89748	1.10838
MT1E	-0.19126	0.19126	-0.38252	0.714422	1.37108	1.09322
CCL17	0.476602	-0.476602	0.953204	0.747538	1.12238	0.95356
TSNAXIP1	0.862295	-0.862295	1.72459	0.408377	0.320268	0.366977
VPS4A	0.638511	-0.638511	1.27702	0.939816	0.627419	0.799034
TERF2IP	0.447706	-0.447706	0.895412	1.25174	0.576044	0.97434
WFDC1	0.796914	-0.796914	1.59383	0.684947	0.354446	0.545337
KIAA0182	0.372044	-0.372044	0.744088	1.25941	0.706146	1.02097
SENP3	0.533505	-0.533505	1.06701	1.07438	0.701307	0.907225
WRAP53	0.393689	-0.393689	0.787377	1.18225	0.798317	1.00872
WRAP53	0.393689	-0.393689	0.787377	1.18225	0.798317	1.00872
WRAP53	0.503769	-0.503769	1.00754	0.202777	1.30289	0.932376
LSMD1	0.581368	-0.581368	1.16274	1.16559	0.356987	0.861984
CYB5D1	0.581368	-0.581368	1.16274	1.16559	0.356987	0.861984
GUCY2D	0.291453	-0.291453	0.582906	1.17856	0.925293	1.05952
ADORA2B	0.206744	-0.206744	0.413488	1.38895	0.66528	1.08898
LLGL1	0.570463	-0.570463	1.14093	1.21674	0.20802	0.872845
TMEM98	0.752483	-0.752483	1.50497	0.601721	0.662752	0.632972
FNDC8	0.539042	-0.539042	1.07808	0.655185	1.095	0.902303
SOCS7	0.599954	-0.599954	1.19991	1.00184	0.645353	0.842664
SNORA21	0.718593	-0.718593	1.43719	0.6386	0.736926	0.689518
GRB7	0.558638	-0.558638	1.11728	1.05282	0.674783	0.884242
RARA	0.326774	-0.326774	0.653547	1.38076	0.522641	1.04395
TMEM99	0.364408	-0.364408	0.728816	0.976871	1.07114	1.02509
FKBP10	0.619288	-0.619288	1.23858	1.14513	0.195239	0.821416
AOC3	0.623107	-0.623107	1.24621	1.08592	0.394948	0.817072
LOC90586	0.686482	-0.686482	1.37296	0.56873	0.873368	0.736962
RUNDC3A	0.722123	-0.722123	1.44425	0.905844	0.339211	0.683965
IGF2BP1	0.50727	-0.50727	1.01454	1.12977	0.672049	0.929524
IGF2BP1	0.626122	-0.626122	1.25224	0.996688	0.574916	0.813608
RSAD1	0.610133	-0.610133	1.22027	0.878453	0.782006	0.831629
SCPEP1	0.447552	-0.447552	0.895105	1.16499	0.736133	0.974446
RPS6KB1	0.716353	-0.716353	1.43271	0.168838	0.965407	0.693007
ARMC7	-0.201771	0.201771	-0.403542	0.671904	1.38795	1.09038
TMC8	0.504351	-0.504351	1.0087	0.348188	1.27108	0.931904
CCDC137	0.64377	-0.64377	1.28754	0.362931	1.06064	0.79268
C17orf90	0.64377	-0.64377	1.28754	0.362931	1.06064	0.79268
SLC25A10	0.435087	-0.435087	0.870174	1.31344	0.454951	0.982878
GPS1	0.460432	-0.460432	0.920864	1.27671	0.483754	0.965403
FN3K	0.87496	-0.87496	1.74992	0.369249	0.258823	0.318853
MYL12B	0.494918	-0.494918	0.989836	1.22167	0.522203	0.939459
MYL12B	0.494918	-0.494918	0.989836	1.22167	0.522203	0.939459
MYL12B	0.494918	-0.494918	0.989836	1.22167	0.522203	0.939459
C18orf1	0.455988	-0.455988	0.911977	0.502145	1.27439	0.968562
MC5R	0.400555	-0.400555	0.80111	0.877212	1.11766	1.00466
GATA6	0.545448	-0.545448	1.0909	1.13248	0.570033	0.896509
ELP2	-0.158084	0.158084	-0.316167	1.0191	1.17748	1.10114
SETBP1	0.738999	-0.738999	1.478	0.914451	0.159437	0.656369
SETBP1	0.738999	-0.738999	1.478	0.914451	0.159437	0.656369
PHLPP1	0.780358	-0.780358	1.56072	0.405218	0.713387	0.580139
SERPINB7	0.678548	-0.678548	1.3571	0.413631	0.973462	0.747903
ARID3A	0.489227	-0.489227	0.978454	1.17308	0.637075	0.94392
AMH	0.329585	-0.329585	0.65917	1.22004	0.828017	1.04262
SLC5A5	0.791239	-0.791239	1.58248	0.563883	0.551233	0.557594
KCNN1	0.278775	-0.278775	0.557551	0.910308	1.19925	1.06462
POP4	0.48496	-0.48496	0.969921	1.17887	0.63616	0.947217
LOC643719	0.544125	-0.544125	1.08825	0.719376	1.04608	0.897715
C19orf55	0.849431	-0.849431	1.69886	0.40034	0.418487	0.409514
HSPB6	0.849431	-0.849431	1.69886	0.40034	0.418487	0.409514
ZNF146	0.542624	-0.542624	1.08525	1.01526	0.765463	0.899076
PAPL	0.473632	-0.473632	0.947265	0.735048	1.13434	0.955776
DLL3	0.401494	-0.401494	0.802989	0.766523	1.19534	1.00409
AXL	0.693616	-0.693616	1.38723	0.925644	0.447072	0.726873
APOE	0.143616	-0.143616	0.287232	1.43292	0.62037	1.10411
SFRS16	0.595062	-0.595062	1.19012	0.568916	1.05548	0.847852
FUT2	0.838635	-0.838635	1.67727	0.180457	0.597922	0.44163
CGB	0.788576	-0.788576	1.57715	0.786164	0.128022	0.563224
PPFIA3	0.542111	-0.542111	1.08422	0.957443	0.837647	0.899541
CD37	0.806606	-0.806606	1.61321	0.631642	0.38625	0.523526
PTOV1	0.20731	-0.20731	0.414619	1.16802	1.00339	1.08882
NAT14	0.579705	-0.579705	1.15941	0.591578	1.06858	0.863663
ZNF580	0.300769	-0.300769	0.601537	1.27081	0.783368	1.05561
ZNF581	0.300769	-0.300769	0.601537	1.27081	0.783368	1.05561
ZNF580	0.300769	-0.300769	0.601537	1.27081	0.783368	1.05561
ZNF583	0.766464	-0.766464	1.53293	0.628954	0.58482	0.607288
ZNF583	0.766464	-0.766464	1.53293	0.628954	0.58482	0.607288
ZNF583	0.766464	-0.766464	1.53293	0.628954	0.58482	0.607288
ZNF544	0.695371	-0.695371	1.39074	0.438791	0.925656	0.724354
ZSCAN22	0.721502	-0.721502	1.443	0.566256	0.785912	0.684946
ZNF446	0.444379	-0.444379	0.888758	0.327123	1.34185	0.976622
MGC2752	0.818804	-0.818804	1.63761	0.443462	0.54039	0.494308
SOX11	0.399282	-0.399282	0.798564	1.28123	0.616577	1.00542
HPCAL1	0.536528	-0.536528	1.07306	1.23743	0.324327	0.904548
FKBP1B	0.609289	-0.609289	1.21858	0.670459	0.967877	0.832556
AGBL5	0.46785	-0.46785	0.935699	0.987589	0.931674	0.960039
PLB1	0.602416	-0.602416	1.20483	0.942384	0.723324	0.840025
FAM179A	0.698107	-0.698107	1.39621	0.601798	0.822057	0.720395
PCBP1	0.408432	-0.408432	0.816865	0.552229	1.30176	0.999887
EMX1	0.538192	-0.538192	1.07638	0.74444	1.03772	0.903063
TMSB10	0.834689	-0.834689	1.66938	0.13306	0.626241	0.452705
MAT2A	0.651495	-0.651495	1.30299	0.776292	0.78996	0.783155
PROM2	0.83471	-0.83471	1.66942	0.419909	0.483172	0.452647
ZAP70	0.352468	-0.352468	0.704937	0.270183	1.43328	1.03133
CHCHD5	0.808649	-0.808649	1.6173	0.55398	0.481005	0.518777
INHBB	0.522559	-0.522559	1.04512	1.02678	0.791528	0.916732
CCDC74A	0.42558	-0.42558	0.85116	1.33527	0.416757	0.989102
MGAT5	0.873412	-0.873412	1.74682	0.226474	0.400208	0.325159
CXCR4	0.661117	-0.661117	1.32223	0.954627	0.526745	0.770965
RAPGEF4	0.539084	-0.539084	1.07817	1.13769	0.57777	0.902266
C2orf62	0.887308	-0.887308	1.77462	0.356041	0.106258	0.262732
BCS1L	0.609484	-0.609484	1.21897	1.08236	0.462704	0.832343
TMEM198	0.631661	-0.631661	1.26332	0.212668	1.12151	0.80716
EIF4E2	0.731937	-0.731937	1.46387	0.509642	0.795656	0.668133
OR6B2	0.787216	-0.787216	1.57443	0.318172	0.734601	0.56607
RAD21L1	0.00164299	-0.00164299	0.00328597	1.47352	0.573356	1.11803
OXT	0.822978	-0.822978	1.64596	0.436111	0.527188	0.483797
SNAP25	0.745561	-0.745561	1.49112	0.516736	0.751931	0.645142
PAX1	0.707504	-0.707504	1.41501	0.819133	0.572133	0.706511
C20orf160	0.81826	-0.81826	1.63652	0.65624	0.246374	0.495656
C20orf118	0.786448	-0.786448	1.5729	0.302256	0.743734	0.56767
BPI	0.865093	-0.865093	1.73019	0.443039	0.241986	0.35696
ADIG	0.268443	-0.268443	0.536887	1.32546	0.725921	1.0686
SLC32A1	0.640997	-0.640997	1.28199	0.825843	0.765082	0.796042
TOX2	0.488697	-0.488697	0.977395	0.653616	1.16461	0.944332
TOX2	0.488697	-0.488697	0.977395	0.653616	1.16461	0.944332
YWHAB	0.528783	-0.528783	1.05757	1.07619	0.709209	0.911363
PCIF1	0.638385	-0.638385	1.27677	0.597116	0.959607	0.799185
RBM38	-0.594576	0.594576	-1.18915	1.19696	0.0820807	0.848363
LSM14B	0.302206	-0.302206	0.604413	1.42203	0.451498	1.05499
OSBPL2	0.712162	-0.712162	1.42432	0.615082	0.774694	0.699456
FLJ16779	0.475044	-0.475044	0.950088	1.06486	0.830106	0.954725
TNFRSF6B	0.437265	-0.437265	0.87453	0.822177	1.11822	0.981427
LIME1	0.702766	-0.702766	1.40553	0.935675	0.377987	0.713569
SLC2A4RG	0.835726	-0.835726	1.67145	0.142946	0.619882	0.449826
KRTAP13-4	0.764015	-0.764015	1.52803	0.350541	0.79118	0.611901
CBR1	0.503619	-0.503619	1.00724	1.26379	0.376764	0.932498
CBR3	0.377497	-0.377497	0.754995	0.241564	1.4192	1.01796
SIM2	0.305788	-0.305788	0.611576	0.660679	1.33528	1.05344
WRB	0.727715	-0.727715	1.45543	0.787318	0.539834	0.675015
PWP2	0.185176	-0.185176	0.370351	1.12609	1.06256	1.09479
KRTAP10-6	0.539558	-0.539558	1.07912	1.07886	0.680209	0.90184
RANBP1	0.790288	-0.790288	1.58058	0.553417	0.565741	0.559613
MED15	0.568591	-0.568591	1.13718	0.691419	1.0257	0.874675
SNAP29	0.6688	-0.6688	1.3376	0.154042	1.06508	0.76096
VPREB1	0.860025	-0.860025	1.72005	0.277676	0.451625	0.37488
SGSM1	0.3612	-0.3612	0.7224	0.894665	1.14376	1.02679
IGLL3	0.693492	-0.693492	1.38698	1.00936	0.195963	0.727051
MPST	0.402407	-0.402407	0.804814	0.389417	1.36476	1.00355
KDELR3	0.641865	-0.641865	1.28373	0.84253	0.744428	0.794994
SEPT3	0.666652	-0.666652	1.3333	0.137298	1.07139	0.763782
TSPO	0.252154	-0.252154	0.504307	0.695998	1.35087	1.07454
LOC150381	0.652556	-0.652556	1.30511	1.0844	0.215839	0.781828
TRABD	-0.661488	0.661488	-1.32298	0.993157	0.448262	0.770487
MAPK8IP2	0.262728	-0.262728	0.525456	0.849418	1.25356	1.07073
RPL15	0.554037	-0.554037	1.10807	1.21839	0.307651	0.888574
CTDSPL	0.656982	-0.656982	1.31396	0.866716	0.673743	0.776249
EIF1B	0.55939	-0.55939	1.11878	0.638184	1.07423	0.883529
KBTBD5	0.878796	-0.878796	1.75759	0.399601	0.153208	0.302617
EXOSC7	0.66431	-0.66431	1.32862	0.591929	0.908679	0.766836
TMIE	0.551625	-0.551625	1.10325	0.931334	0.848379	0.890823
TMEM89	0.761936	-0.761936	1.52387	0.144624	0.858747	0.615777
CACNA1D	0.718081	-0.718081	1.43616	0.491274	0.843641	0.690319
FLNB	0.594338	-0.594338	1.18868	1.19118	0.146212	0.848613
LOC255025	0.779693	-0.779693	1.55939	0.493826	0.657548	0.581478
CHCHD6	0.48926	-0.48926	0.978521	1.13648	0.7002	0.943894
CCDC48	0.132349	-0.132349	0.264698	1.07528	1.13632	1.10622
UBA5	-0.373041	0.373041	-0.746082	1.08586	0.950489	1.02042
TSC22D2	0.839735	-0.839735	1.67947	0.433404	0.443503	0.438483
EIF2A	0.743316	-0.743316	1.48663	0.272398	0.876496	0.649017
POLR2H	0.647503	-0.647503	1.29501	0.505452	0.993347	0.788105
SST	0.521933	-0.521933	1.04387	0.593435	1.15351	0.917267
TADA2B	-0.0788397	0.0788397	-0.157679	0.540553	1.47958	1.11386
SLIT2	0.298527	-0.298527	0.597053	1.13264	0.974558	1.05656
RBPJ	-0.289807	0.289807	-0.579615	1.48321	0.219384	1.0602
POLR2B	0.543475	-0.543475	1.08695	1.23699	0.289418	0.898305
CXCL2	0.514961	-0.514961	1.02992	0.791657	1.03814	0.92316
POU4F2	0.309003	-0.309003	0.618007	1.31295	0.699798	1.05203
SPCS3	0.501192	-0.501192	1.00238	0.444283	1.2446	0.934457
MRPL36	0.00762717	-0.00762717	0.0152543	0.902126	1.29846	1.11799
NDUFS6	0.00762717	-0.00762717	0.0152543	0.902126	1.29846	1.11799
UBE2QL1	0.652812	-0.652812	1.30562	0.662397	0.884726	0.781508
ANKRD33B	0.692723	-0.692723	1.38545	0.217245	1.00658	0.72815
MARVELD2	0.789409	-0.789409	1.57882	0.747379	0.268189	0.561471
HEXB	0.747734	-0.747734	1.49547	0.558051	0.715024	0.641358
SV2C	0.246022	-0.246022	0.492044	1.07534	1.07799	1.07667
F2R	0.496464	-0.496464	0.992929	0.0936601	1.32355	0.938235
FLJ11235	0.827417	-0.827417	1.65483	0.238478	0.623916	0.472305
IL3	0.7418	-0.7418	1.4836	0.886031	0.253274	0.651613
SLC35A4	0.720533	-0.720533	1.44107	0.832689	0.499124	0.686475
NDUFA2	0.563859	-0.563859	1.12772	1.18335	0.381943	0.879258
IK	0.563859	-0.563859	1.12772	1.18335	0.381943	0.879258
FABP6	0.771024	-0.771024	1.54205	0.477218	0.699164	0.598568
FGF18	0.391581	-0.391581	0.783162	1.02306	0.99666	1.00995
CPLX2	0.763859	-0.763859	1.52772	0.702878	0.50549	0.612191
FGFR4	0.588804	-0.588804	1.17761	1.18552	0.233416	0.85438
PRELID1	0.819147	-0.819147	1.63829	0.398171	0.573108	0.493454
TMEM170B	0.49967	-0.49967	0.999341	1.07396	0.773051	0.935678
HIST1H2BI	0.861873	-0.861873	1.72375	0.508571	0.11348	0.368458
LTA	0.850116	-0.850116	1.70023	0.0764121	0.571023	0.407373
LTA	0.850116	-0.850116	1.70023	0.0764121	0.571023	0.407373
PI16	0.895494	-0.895494	1.79099	0.250729	0.177221	0.217108
GLP1R	0.331124	-0.331124	0.662248	0.54199	1.37015	1.04189
GUCA1A	0.678106	-0.678106	1.35621	0.675873	0.814686	0.748504
CUL9	0.308291	-0.308291	0.616581	0.937726	1.15566	1.05235
SMAP1	0.904529	-0.904529	1.80906	0.204452	0.0606941	0.150805
VTA1	0.877275	-0.877275	1.75455	0.343685	0.270267	0.309163
C6orf72	-0.304315	0.304315	-0.60863	1.43247	0.412549	1.05408
PPP1R14C	0.841556	-0.841556	1.68311	0.595048	0.145837	0.433215
FNDC1	0.659334	-0.659334	1.31867	1.00652	0.427504	0.773252
WTAP	0.835796	-0.835796	1.67159	0.455415	0.443771	0.44963
TTYH3	0.338861	-0.338861	0.677722	0.996565	1.07814	1.03815
C7orf30	0.591542	-0.591542	1.18308	0.414369	1.13072	0.851539
UPP1	0.731222	-0.731222	1.46244	0.894289	0.310148	0.669307
TPST1	0.620184	-0.620184	1.24037	1.00835	0.573897	0.820401
KCTD7	0.494927	-0.494927	0.989853	1.06962	0.788077	0.939453
AUTS2	0.597933	-0.597933	1.19587	0.895434	0.790966	0.844816
AUTS2	0.597933	-0.597933	1.19587	0.895434	0.790966	0.844816
ELN	0.326914	-0.326914	0.653829	1.03759	1.05014	1.04388
GATAD1	0.877754	-0.877754	1.75551	0.147414	0.408547	0.307117
NPTX2	0.570536	-0.570536	1.14107	0.303397	1.19642	0.872773
PCOLCE	0.646662	-0.646662	1.29332	0.910394	0.645499	0.789141
UFSP1	0.717501	-0.717501	1.435	0.554363	0.805144	0.691222
MEST	0.55955	-0.55955	1.1191	0.715921	1.0238	0.883378
MIR671	0.347061	-0.347061	0.694123	1.22694	0.795782	1.03408
DPYSL2	0.790393	-0.790393	1.58079	0.476731	0.631319	0.559391
RNF5P1	0.493258	-0.493258	0.986515	0.134284	1.32365	0.940769
GINS4	0.374085	-0.374085	0.74817	1.43656	0.128417	1.01985
SGK3	0.769878	-0.769878	1.53976	0.559408	0.639473	0.600776
ZBTB10	0.253385	-0.253385	0.506769	1.16049	0.980133	1.0741
FZD6	0.70432	-0.70432	1.40864	0.424235	0.912044	0.711266
FZD6	0.70432	-0.70432	1.40864	0.424235	0.912044	0.711266
CTHRC1	0.802985	-0.802985	1.60597	0.719495	0.219024	0.53181
GPIHBP1	0.382559	-0.382559	0.765119	1.32916	0.542482	1.01512
ZNF623	0.797162	-0.797162	1.59432	0.702933	0.31541	0.544793
MIR937	0.797672	-0.797672	1.59534	0.299519	0.708129	0.543672
MIR661	0.570865	-0.570865	1.14173	0.450467	1.14866	0.872451
PPP1R16A	0.590326	-0.590326	1.18065	0.991236	0.687021	0.852803
DNAJB5	-0.0164461	0.0164461	-0.0328922	0.572891	1.47343	1.11785
DNAJB5	-0.0164461	0.0164461	-0.0328922	0.572891	1.47343	1.11785
NPR2	0.400685	-0.400685	0.80137	1.31514	0.537358	1.00458
C9orf103	0.86352	-0.86352	1.72704	0.493886	0.138121	0.36263
ANKRD19	0.539525	-0.539525	1.07905	1.14645	0.558928	0.90187
GALNT12	0.855395	-0.855395	1.71079	0.426007	0.351308	0.390448
TMEFF1	0.0740541	-0.0740541	0.148108	1.12418	1.10444	1.11435
GNG10	0.58988	-0.58988	1.17976	0.416813	1.13243	0.853265
SLC2A8	0.611548	-0.611548	1.2231	0.412249	1.09913	0.830068
SLC25A25	0.564554	-0.564554	1.12911	0.459065	1.1546	0.878588
ENDOG	0.824684	-0.824684	1.64937	0.598748	0.3181	0.47942
NUP188	0.701513	-0.701513	1.40303	0.957927	0.325599	0.715415
CEL	0.764988	-0.764988	1.52998	0.82045	0.266915	0.610074
ADAMTS13	0.705878	-0.705878	1.41176	0.365747	0.933508	0.708946
ADAMTSL2	0.295229	-0.295229	0.590457	0.968969	1.14001	1.05795
OLFM1	0.771458	-0.771458	1.54292	0.745529	0.398425	0.597727
OLFM1	0.771458	-0.771458	1.54292	0.745529	0.398425	0.597727
PAEP	0.264389	-0.264389	0.528777	1.40984	0.550138	1.07012
GRIN1	0.452866	-0.452866	0.905732	1.18414	0.694656	0.970757
ASMT	0.532108	-0.532108	1.06422	1.1661	0.539247	0.908456
VCX2	0.658057	-0.658057	1.31611	1.00657	0.433243	0.774882
TBL1X	0.740381	-0.740381	1.48076	0.403479	0.832294	0.654029
PTCHD1	0.627055	-0.627055	1.25411	0.675239	0.929763	0.812529
PTCHD1	0.831713	-0.831713	1.66343	0.442835	0.478184	0.460849
MAGEB2	-0.177069	0.177069	-0.354138	0.961266	1.21734	1.0968
MID1IP1	0.646538	-0.646538	1.29308	0.665657	0.896028	0.789293
PLP2	0.831914	-0.831914	1.66383	0.258937	0.597252	0.460304
USP27X	0.7219	-0.7219	1.4438	0.84742	0.467396	0.684317
INGX	0.815106	-0.815106	1.63021	0.650594	0.289022	0.503392
TIMM8A	0.228945	-0.228945	0.457891	1.07029	1.09418	1.0823
ZCCHC16	0.57902	-0.57902	1.15804	0.686596	1.01133	0.864352
NDUFA1	0.710404	-0.710404	1.42081	0.597729	0.792905	0.702132
RNF113A	0.710404	-0.710404	1.42081	0.597729	0.792905	0.702132
RAB33A	0.782992	-0.782992	1.56598	0.634294	0.508371	0.574791
MST4	0.763792	-0.763792	1.52758	0.352494	0.790956	0.612317
MST4	0.763792	-0.763792	1.52758	0.352494	0.790956	0.612317
FAM127A	0.837548	-0.837548	1.6751	0.617219	0.120743	0.444712
SOX3	0.813606	-0.813606	1.62721	0.661597	0.27645	0.507018
AFF2	0.25712	-0.25712	0.514241	1.37216	0.647175	1.07277
GPR50	0.513868	-0.513868	1.02774	1.15528	0.610866	0.924073
MAGEA4	0.405856	-0.405856	0.811713	1.3713	0.354083	1.00146
ZFP92	0.653881	-0.653881	1.30776	1.03275	0.38827	0.780167
AVPR2	0.25997	-0.25997	0.519939	1.04811	1.09486	1.07174
CSF2RA	0.324156	-0.324156	0.648312	1.34892	0.604306	1.04517
TBL1Y	0.56754	-0.56754	1.13508	0.99191	0.74149	0.875698
CSPG4LYP1	0.772456	-0.772456	1.54491	0.408542	0.736906	0.595792
TTLL10	-0.555532	0.555532	-1.11106	0.739104	1.01384	0.887173
TAS1R3	-0.329007	0.329007	-0.658015	0.459389	1.40151	1.0429
SLC25A33	-0.574616	0.574616	-1.14923	1.20627	0.233178	0.868749
CLCN6	-0.753802	0.753802	-1.5076	0.424025	0.784569	0.630613
LYPLA2	-0.765517	0.765517	-1.53103	0.759913	0.405567	0.609078
LOC284632	-0.459827	0.459827	-0.919655	0.44583	1.29109	0.965835
STX12	-0.418689	0.418689	-0.837378	1.37295	0.298504	0.993503
RNU11	-0.704507	0.704507	-1.40901	0.406487	0.919661	0.710988
ZCCHC17	-0.0463359	0.0463359	-0.0926718	1.51879	0.432259	1.11659
GJA4	-0.431792	0.431792	-0.863584	1.04595	0.920141	0.985055
KIAA0754	-0.806206	0.806206	-1.61241	0.20698	0.712218	0.52445
PPIE	-0.587105	0.587105	-1.17421	0.680418	1.00148	0.856132
ACADM	-0.56054	0.56054	-1.12108	0.889542	0.875272	0.882436
AMPD2	-0.658193	0.658193	-1.31639	0.917212	0.599222	0.774708
KCNC4	-0.577731	0.577731	-1.15546	1.15757	0.398398	0.865644
DCLRE1B	-0.643943	0.643943	-1.28789	1.05139	0.388063	0.792469
LCE2D	-0.86249	0.86249	-1.72498	0.440893	0.271932	0.366288
S100A3	-0.398673	0.398673	-0.797346	1.07	0.937161	1.00578
ROBLD3	-0.894925	0.894925	-1.78985	0.175942	0.257626	0.220598
DUSP23	-0.642669	0.642669	-1.28534	0.165017	1.11072	0.794018
C1orf49	-0.720048	0.720048	-1.4401	0.857384	0.457694	0.687238
CACNA1E	-0.760846	0.760846	-1.52169	0.178962	0.855168	0.617794
TROVE2	-0.0108539	0.0108539	-0.0217079	1.28668	0.918751	1.11795
TROVE2	-0.0108539	0.0108539	-0.0217079	1.28668	0.918751	1.11795
IKBKE	-0.850737	0.850737	-1.70147	0.408282	0.402552	0.405427
CNIH3	-0.749257	0.749257	-1.49851	0.572514	0.698621	0.638687
NLRP3	-0.730393	0.730393	-1.46079	0.475065	0.82091	0.670664
NLRP3	-0.730393	0.730393	-1.46079	0.475065	0.82091	0.670664
OR2M5	-0.601765	0.601765	-1.20353	1.02776	0.597783	0.840725
SIRT1	-0.30569	0.30569	-0.611379	0.58377	1.37072	1.05349
SIRT1	-0.30569	0.30569	-0.611379	0.58377	1.37072	1.05349
LZTS2	-0.624406	0.624406	-1.24881	0.218853	1.13245	0.815583
SFXN3	-0.627264	0.627264	-1.25453	0.678051	0.927289	0.812286
NFKB2	-0.557193	0.557193	-1.11439	1.00917	0.741749	0.885609
NFKB2	-0.557193	0.557193	-1.11439	1.00917	0.741749	0.885609
C10orf26	-0.402592	0.402592	-0.805185	0.228709	1.40052	1.00343
SORCS3	-0.794394	0.794394	-1.58879	0.7569	0.184171	0.550825
MUC2	-0.468834	0.468834	-0.937668	0.421945	1.2894	0.959319
OR52K2	-0.289639	0.289639	-0.579279	1.0336	1.08627	1.06027
PRKCDBP	-0.775884	0.775884	-1.55177	0.795068	0.248758	0.589073
KCNC1	-0.625578	0.625578	-1.25116	0.689186	0.922485	0.814235
SAA1	-0.690278	0.690278	-1.38056	0.701019	0.760999	0.731624
LDHAL6A	-0.0551667	0.0551667	-0.110333	1.29013	0.90909	1.11599
TCP11L1	-0.63668	0.63668	-1.27336	0.568025	0.980441	0.801223
OR9G9	-0.59015	0.59015	-1.1803	0.491646	1.10157	0.852986
OR9G1	-0.59015	0.59015	-1.1803	0.491646	1.10157	0.852986
FAM111B	-0.810275	0.810275	-1.62055	0.502443	0.527176	0.514958
ASRGL1	-0.703626	0.703626	-1.40725	0.181879	0.990782	0.712295
RARRES3	-0.622802	0.622802	-1.2456	1.13747	0.206187	0.817421
GPR137	-0.528871	0.528871	-1.05774	0.952677	0.867923	0.911286
SSH3	-0.458921	0.458921	-0.917843	0.705287	1.17079	0.966482
P2RY2	-0.64235	0.64235	-1.2847	0.365362	1.06239	0.794405
P2RY2	-0.64235	0.64235	-1.2847	0.365362	1.06239	0.794405
UVRAG	-0.47823	0.47823	-0.95646	0.511464	1.24591	0.952336
THRSP	-0.720373	0.720373	-1.44075	0.924066	0.298814	0.686727
MIR34C	-0.634513	0.634513	-1.26903	0.437643	1.04912	0.803797
C11orf88	-0.634513	0.634513	-1.26903	0.437643	1.04912	0.803797
MIR34B	-0.634513	0.634513	-1.26903	0.437643	1.04912	0.803797
TIMM8B	-0.410678	0.410678	-0.821355	0.749719	1.19664	0.998507
SDHD	-0.410678	0.410678	-0.821355	0.749719	1.19664	0.998507
REXO2	-0.223777	0.223777	-0.447554	1.27497	0.851013	1.08392
APOC3	-0.60634	0.60634	-1.21268	0.587446	1.02565	0.83578
CD3E	-0.315347	0.315347	-0.630694	0.886067	1.19019	1.04921
OR10G4	-0.763432	0.763432	-1.52686	0.509766	0.701181	0.612991
OR8D1	-0.636602	0.636602	-1.2732	1.04476	0.438974	0.801316
HYLS1	-0.647037	0.647037	-1.29407	0.673348	0.889175	0.788679
IQSEC3	-0.421166	0.421166	-0.842331	1.38994	0.189565	0.991932
WNT5B	-0.424069	0.424069	-0.848138	0.439366	1.32946	0.990075
CD9	-0.827019	0.827019	-1.65404	0.32605	0.584644	0.473348
C12orf57	-0.579356	0.579356	-1.15871	1.12815	0.469384	0.864014
EMG1	-0.654637	0.654637	-1.30927	1.04574	0.347545	0.779215
SCARNA12	-0.654637	0.654637	-1.30927	1.04574	0.347545	0.779215
AQP6	-0.400104	0.400104	-0.800207	1.25267	0.671239	1.00493
GRASP	-0.402198	0.402198	-0.804396	1.19324	0.768698	1.00367
HOXC10	-0.491356	0.491356	-0.982712	1.07717	0.784484	0.94226
NXPH4	-0.462159	0.462159	-0.924319	1.11908	0.779028	0.964164
INHBE	-0.442273	0.442273	-0.884545	1.15927	0.754506	0.978055
LOC100130776	-0.448064	0.448064	-0.896128	0.971556	0.976625	0.974094
UBE3B	-0.811595	0.811595	-1.62319	0.704686	0.16541	0.511831
SDSL	-0.678879	0.678879	-1.35776	0.230035	1.03172	0.747452
ARL6IP4	0.0252458	-0.0252458	0.0504917	1.21126	1.01535	1.11761
PABPC3	-0.529689	0.529689	-1.05938	1.04065	0.758515	0.910573
PDX1	-0.272845	0.272845	-0.54569	1.1915	0.925734	1.06693
SERPINE3	-0.247967	0.247967	-0.495935	1.15391	0.991987	1.076
CARKD	-0.206293	0.206293	-0.412586	1.24897	0.901331	1.08911
GRK1	-0.689801	0.689801	-1.3796	0.597571	0.845833	0.732299
OR4K17	-0.859634	0.859634	-1.71927	0.38902	0.362975	0.376222
RNASE2	-0.473008	0.473008	-0.946016	0.400618	1.29163	0.95624
MRPL52	-0.451364	0.451364	-0.902728	0.145042	1.36667	0.971805
THTPA	-0.551472	0.551472	-1.10294	1.0455	0.703261	0.890965
LTB4R	-0.76886	0.76886	-1.53772	0.237411	0.818656	0.602728
BATF	-0.0291602	0.0291602	-0.0583204	0.75273	1.38955	1.11746
NRXN3	-0.658871	0.658871	-1.31774	0.343793	1.03898	0.773843
C14orf109	0.34424	-0.34424	0.688481	1.21736	0.813954	1.03549
C14orf109	0.34424	-0.34424	0.688481	1.21736	0.813954	1.03549
GLRX5	-0.302225	0.302225	-0.60445	1.46595	0.277429	1.05498
SCARNA13	-0.302225	0.302225	-0.60445	1.46595	0.277429	1.05498
C14orf68	-0.602901	0.602901	-1.2058	0.2126	1.16805	0.839503
SNORD114-7	-0.629085	0.629085	-1.25817	0.298785	1.10611	0.810172
SNORD114-8	-0.629085	0.629085	-1.25817	0.298785	1.10611	0.810172
DIO3	-0.516053	0.516053	-1.03211	1.20193	0.506393	0.922244
MIR1247	-0.516053	0.516053	-1.03211	1.20193	0.506393	0.922244
PPP2R5C	-0.663398	0.663398	-1.3268	0.574863	0.921544	0.76802
SIVA1	-0.85467	0.85467	-1.70934	0.2543	0.493909	0.39282
SNORD116-3	-0.749331	0.749331	-1.49866	0.705447	0.563783	0.638556
SNORD116-10	-0.749331	0.749331	-1.49866	0.705447	0.563783	0.638556
SNORD116-9	-0.749331	0.749331	-1.49866	0.705447	0.563783	0.638556
SNORD116-11	-0.749331	0.749331	-1.49866	0.705447	0.563783	0.638556
HBII-52-28	-0.694412	0.694412	-1.38882	0.949448	0.389777	0.725733
SNORD115-36	-0.694412	0.694412	-1.38882	0.949448	0.389777	0.725733
SNORD115-11	-0.694412	0.694412	-1.38882	0.949448	0.389777	0.725733
SNORD115-43	-0.694412	0.694412	-1.38882	0.949448	0.389777	0.725733
SNORD115-29	-0.694412	0.694412	-1.38882	0.949448	0.389777	0.725733
SNORD115-39	-0.683461	0.683461	-1.36692	0.997944	0.320547	0.741162
FAM7A2	-0.755754	0.755754	-1.51151	0.667437	0.583983	0.6271
FAM7A3	-0.755754	0.755754	-1.51151	0.667437	0.583983	0.6271
FAM7A1	-0.755754	0.755754	-1.51151	0.667437	0.583983	0.6271
DISP2	-0.626911	0.626911	-1.25382	0.90985	0.702225	0.812695
CHAC1	-0.713408	0.713408	-1.42682	0.84825	0.503604	0.697548
CCNB2	-0.649188	0.649188	-1.29838	0.822075	0.748236	0.786023
ARIH1	-0.572353	0.572353	-1.14471	0.691692	1.01921	0.870987
ISLR	-0.256087	0.256087	-0.512174	0.623788	1.38353	1.07314
PPCDC	-0.635587	0.635587	-1.27117	0.584403	0.972913	0.802523
AKAP13	-0.68437	0.68437	-1.36874	0.888042	0.553441	0.739903
PIGQ	-0.298711	0.298711	-0.597423	1.21593	0.868227	1.05648
METRN	-0.7156	0.7156	-1.4312	0.325881	0.92604	0.694172
TMEM204	0.367719	-0.367719	0.735439	1.44393	0.0970045	1.02332
PRSS21	-0.489653	0.489653	-0.979306	0.42761	1.26407	0.943589
PRM3	-0.724585	0.724585	-1.44917	0.484579	0.830731	0.680048
IL21R	-0.793936	0.793936	-1.58787	0.523596	0.578659	0.551815
IL21R	-0.793936	0.793936	-1.58787	0.523596	0.578659	0.551815
TRIM72	-0.566089	0.566089	-1.13218	1.18011	0.382044	0.877106
TGFB1I1	-0.772191	0.772191	-1.54438	0.614005	0.578066	0.596306
NKD1	-0.695424	0.695424	-1.39085	0.99436	0.245773	0.724278
MT4	-0.617387	0.617387	-1.23477	0.617824	0.987316	0.823559
PSMD7	-0.629929	0.629929	-1.25986	0.820339	0.797878	0.809187
OR1G1	-0.527069	0.527069	-1.05414	1.17889	0.526141	0.912851
SPNS2	-0.145395	0.145395	-0.290789	0.521337	1.47132	1.10376
SENP3	-0.519683	0.519683	-1.03937	1.09724	0.69703	0.919181
ALKBH5	-0.555897	0.555897	-1.11179	0.614692	1.0932	0.88683
FOXN1	0.0456194	-0.0456194	0.0912389	1.2732	0.934189	1.11664
PPP1R1B	-0.520975	0.520975	-1.04195	0.918515	0.917652	0.918083
PPP1R1B	-0.520975	0.520975	-1.04195	0.918515	0.917652	0.918083
KRTAP9-3	-0.446774	0.446774	-0.893547	1.30638	0.441085	0.974982
HSD17B1	-0.426237	0.426237	-0.852474	1.1554	0.787406	0.988677
LOC643008	-0.21087	0.21087	-0.421741	1.13186	1.04187	1.0878
CDK3	-0.223581	0.223581	-0.447161	0.600274	1.41057	1.08398
SEPT9	-0.728248	0.728248	-1.4565	0.830025	0.469068	0.674153
GAA	-0.714652	0.714652	-1.4293	0.919333	0.350204	0.695635
SLC26A11	-0.326436	0.326436	-0.652871	1.22794	0.820045	1.04411
MIB1	-0.281596	0.281596	-0.563192	1.11813	1.00593	1.06351
TNFRSF11A	-0.630393	0.630393	-1.26079	1.00952	0.537301	0.808645
HSD11B1L	-0.291821	0.291821	-0.583643	0.964486	1.14642	1.05937
HSD11B1L	-0.291821	0.291821	-0.583643	0.964486	1.14642	1.05937
HSD11B1L	-0.291821	0.291821	-0.583643	0.964486	1.14642	1.05937
HSD11B1L	-0.291821	0.291821	-0.583643	0.964486	1.14642	1.05937
PDE4A	-0.70389	0.70389	-1.40778	0.537014	0.851606	0.711905
PDE4A	-0.70389	0.70389	-1.40778	0.537014	0.851606	0.711905
PDE4A	-0.765104	0.765104	-1.53021	0.68198	0.527967	0.609855
C19orf39	-0.567811	0.567811	-1.13562	0.53334	1.11728	0.875434
MORG1	-0.479334	0.479334	-0.958668	0.958123	0.944837	0.951503
MAST1	-0.806274	0.806274	-1.61255	0.598024	0.438328	0.524292
GCDH	-0.289876	0.289876	-0.579752	1.0558	1.06452	1.06017
TPM4	-0.277612	0.277612	-0.555224	0.625217	1.37036	1.06508
FAM125A	-0.716725	0.716725	-1.43345	0.897746	0.391113	0.692429
ZNF486	-0.364655	0.364655	-0.729311	0.378922	1.39911	1.02496
WDR62	-0.69635	0.69635	-1.3927	0.36912	0.953435	0.722941
ZNF568	-0.759615	0.759615	-1.51923	0.612367	0.627663	0.620062
SPINT2	-0.0875875	0.0875875	-0.175175	1.25116	0.954767	1.11288
LEUTX	-0.696363	0.696363	-1.39273	0.782463	0.658016	0.722922
SPTBN4	-0.818551	0.818551	-1.6371	0.323844	0.620521	0.494935
C19orf69	-0.68853	0.68853	-1.37706	0.776283	0.68932	0.734091
CIC	-0.56338	0.56338	-1.12676	0.962244	0.788603	0.879718
IRGC	-0.435892	0.435892	-0.871784	1.25822	0.58896	0.982343
ZNF225	-0.135851	0.135851	-0.271702	1.25907	0.927031	1.10558
GIPR	-0.444067	0.444067	-0.888135	0.452654	1.30519	0.976835
IGFL2	-0.652929	0.652929	-1.30586	0.440429	1.01345	0.781361
IGFL2	-0.652929	0.652929	-1.30586	0.440429	1.01345	0.781361
BAX	-0.429362	0.429362	-0.858724	0.82677	1.12401	0.986647
ZNF525	-0.5609	0.5609	-1.1218	0.841226	0.921148	0.882092
LENG9	-0.584722	0.584722	-1.16944	1.02605	0.649252	0.858574
KIR2DL1	-0.655054	0.655054	-1.31011	1.08395	0.194355	0.778688
SSC5D	-0.719901	0.719901	-1.4398	0.788159	0.56924	0.68747
U2AF2	-0.574262	0.574262	-1.14852	0.675133	1.02707	0.8691
MIMT1	0.0694828	-0.0694828	0.138966	1.07779	1.1506	1.11479
TTC15	-0.639786	0.639786	-1.27957	0.838989	0.753738	0.797503
MAPRE3	-0.807283	0.807283	-1.61457	0.729888	0.110214	0.52196
TMEM214	-0.652854	0.652854	-1.30571	0.779024	0.783878	0.781455
KRTCAP3	-0.266736	0.266736	-0.533472	1.49254	0.24264	1.06924
BRE	-0.474465	0.474465	-0.948931	0.809005	1.08174	0.955156
BRE	-0.474465	0.474465	-0.948931	0.809005	1.08174	0.955156
UGP2	-0.441879	0.441879	-0.883758	0.595274	1.24895	0.978322
UGP2	-0.441879	0.441879	-0.883758	0.595274	1.24895	0.978322
ATP6V1B1	-0.187068	0.187068	-0.374136	0.86732	1.28171	1.09431
NAGK	-0.26099	0.26099	-0.52198	1.4581	0.411836	1.07137
MTHFD2	-0.434457	0.434457	-0.868915	1.28133	0.540318	0.983296
OSBPL6	-0.844199	0.844199	-1.6884	0.379569	0.466811	0.425432
DNAJC10	-0.61321	0.61321	-1.22642	0.648984	0.975059	0.828227
WNT10A	-0.647451	0.647451	-1.2949	0.943179	0.593999	0.788169
DGKD	-0.619065	0.619065	-1.23813	1.14056	0.222266	0.821667
PRR21	-0.24189	0.24189	-0.48378	0.455368	1.45503	1.07807
ANO7	-0.733714	0.733714	-1.46743	0.612382	0.714128	0.665203
D2HGDH	-0.835976	0.835976	-1.67195	0.316026	0.550962	0.449127
NEU4	-0.73565	0.73565	-1.4713	0.764458	0.540428	0.661989
SNRPB2	-0.725034	0.725034	-1.45007	0.915721	0.290569	0.679329
DEFB118	-0.166758	0.166758	-0.333515	1.21356	0.971521	1.09922
C20orf71	-0.542263	0.542263	-1.08453	1.0863	0.661666	0.899403
C20orf4	-0.624084	0.624084	-1.24817	0.200075	1.13645	0.815953
SNORA71A	-0.0246009	0.0246009	-0.0492018	1.10822	1.12696	1.11763
LOC284749	-0.781966	0.781966	-1.56393	0.623921	0.52565	0.576882
C20orf177	-0.331351	0.331351	-0.662701	1.18654	0.873347	1.04178
LIME1	-0.513668	0.513668	-1.02734	1.16131	0.59982	0.924239
COL6A1	-0.807394	0.807394	-1.61479	0.6326	0.379689	0.521702
CCT8L2	-0.600403	0.600403	-1.20081	0.833198	0.851075	0.842184
RANBP1	-0.223537	0.223537	-0.447075	1.23837	0.903623	1.084
ZNF74	-0.591002	0.591002	-1.182	1.14565	0.373686	0.852101
CABIN1	-0.290127	0.290127	-0.580254	1.16508	0.943433	1.06007
MYO18B	-0.608677	0.608677	-1.21735	1.13342	0.322318	0.833228
YWHAH	-0.770481	0.770481	-1.54096	0.631416	0.566032	0.599616
RFPL3	-0.894513	0.894513	-1.78903	0.275767	0.153265	0.223089
CSF2RB	-0.222455	0.222455	-0.444911	0.886415	1.25132	1.08433
TTC38	-0.546557	0.546557	-1.09311	0.538715	1.14613	0.895496
HRH1	-0.821163	0.821163	-1.64233	0.579952	0.375139	0.488402
TREX1	-0.593207	0.593207	-1.18641	0.60957	1.03573	0.849798
CYB561D2	-0.505227	0.505227	-1.01045	1.25733	0.391614	0.931192
PRKCD	-0.270553	0.270553	-0.541106	1.37921	0.61496	1.0678
CD96	-0.859101	0.859101	-1.7182	0.220627	0.486989	0.378044
PLCXD2	-0.850726	0.850726	-1.70145	0.322633	0.47403	0.405461
ABTB1	-0.189382	0.189382	-0.378764	1.22157	0.948768	1.09371
TRIM42	-0.718918	0.718918	-1.43784	0.93634	0.2697	0.689011
KCNAB1	-0.74413	0.74413	-1.48826	0.618576	0.675406	0.647615
RSRC1	-0.412141	0.412141	-0.824282	1.19467	0.750455	0.997602
LPP	-0.704566	0.704566	-1.40913	0.762936	0.654743	0.710901
MUC20	-0.511569	0.511569	-1.02314	0.590211	1.16899	0.925983
SH3BP2	-0.241188	0.241188	-0.482376	0.915648	1.21946	1.07831
DOK7	-0.733859	0.733859	-1.46772	0.891088	0.300528	0.664964
FAT4	-0.655556	0.655556	-1.31111	0.773674	0.782412	0.778055
ING2	-0.838342	0.838342	-1.67668	0.393929	0.486178	0.442464
POLR3G	-0.328487	0.328487	-0.656975	0.755247	1.26724	1.04314
CTXN3	-0.22026	0.22026	-0.44052	0.320941	1.50048	1.085
IL13	-0.878927	0.878927	-1.75785	0.344251	0.25289	0.302045
TMCO6	-0.764859	0.764859	-1.52972	0.199292	0.839794	0.610316
TLX3	-0.425654	0.425654	-0.851309	0.453526	1.32317	0.989054
SNORA74B	-0.727829	0.727829	-1.45566	0.520577	0.799871	0.674831
PCDH24	-0.0928216	0.0928216	-0.185643	1.12961	1.09459	1.11224
GCNT2	-0.641445	0.641445	-1.28289	0.923823	0.642025	0.795502
NOL7	-0.745945	0.745945	-1.49189	0.58175	0.701616	0.644476
BTN3A2	-0.0743268	0.0743268	-0.148654	1.38713	0.747868	1.11432
MOG	-0.435034	0.435034	-0.870068	1.38381	0.131593	0.982913
DDR1	-0.795557	0.795557	-1.59111	0.64145	0.435674	0.548302
DDR1	-0.795557	0.795557	-1.59111	0.64145	0.435674	0.548302
C4B	-0.362688	0.362688	-0.725376	0.22732	1.43307	1.02601
DAAM2	-0.653568	0.653568	-1.30714	0.619119	0.913914	0.78056
DAAM2	-0.710578	0.710578	-1.42116	0.719351	0.683938	0.701868
MDFI	-0.724204	0.724204	-1.44841	0.672594	0.688623	0.680656
PRICKLE4	-0.233218	0.233218	-0.466436	1.49664	0.311291	1.08093
HSP90AB1	0.625627	-0.625627	1.25125	1.1172	0.278644	0.814179
RIPPLY2	-0.558284	0.558284	-1.11657	0.247901	1.22617	0.884579
AIM1	-0.0804195	0.0804195	-0.160839	0.342831	1.53723	1.11369
C6orf203	-0.348098	0.348098	-0.696195	1.29653	0.674906	1.03356
SLC35F1	-0.243059	0.243059	-0.486118	0.352955	1.48263	1.07768
TMEM200A	-0.617019	0.617019	-1.23404	0.677014	0.948428	0.823973
PCMT1	-0.827638	0.827638	-1.65528	0.600287	0.291032	0.471722
CCR6	-0.457235	0.457235	-0.91447	0.757408	1.1398	0.96768
CYP2W1	-0.509526	0.509526	-1.01905	1.2334	0.44706	0.927672
FERD3L	-0.709809	0.709809	-1.41962	0.863336	0.493117	0.703034
HOXA11AS	-0.6543	0.6543	-1.3086	0.523314	0.970472	0.779639
AVL9	-0.563599	0.563599	-1.1272	0.513506	1.13286	0.879508
ZMIZ2	-0.132241	0.132241	-0.264482	1.33757	0.811442	1.10624
RUNDC3B	-0.744168	0.744168	-1.48834	0.766189	0.501593	0.64755
KLHDC10	-0.415217	0.415217	-0.830435	0.622435	1.26307	0.995687
TMEM213	-0.764385	0.764385	-1.52877	0.339811	0.794781	0.611207
CLEC2L	-0.122805	0.122805	-0.24561	1.11265	1.10307	1.10787
LOC202781	-0.763355	0.763355	-1.52671	0.603806	0.622323	0.613135
RBPMS	-0.650828	0.650828	-1.30166	0.320924	1.06126	0.783986
TACC1	-0.0102184	0.0102184	-0.0204369	1.0336	1.19639	1.11796
DMRT1	-0.0771943	0.0771943	-0.154389	1.27034	0.93186	1.11403
SH3GL2	-0.235047	0.235047	-0.470093	1.18845	0.960123	1.08034
FAM95B1	-0.269648	0.269648	-0.539297	0.981088	1.14862	1.06815
CTSL1	-0.527345	0.527345	-1.05469	0.891832	0.932929	0.912612
LPPR1	-0.267459	0.267459	-0.534917	1.07967	1.05816	1.06897
NEK6	-0.651809	0.651809	-1.30362	0.960775	0.549861	0.782763
URM1	-0.253734	0.253734	-0.507467	1.3159	0.758465	1.07398
SET	-0.890387	0.890387	-1.78077	0.341758	0.0695301	0.24661
PPP2R4	-0.621764	0.621764	-1.24353	0.908051	0.718101	0.818605
PPP2R4	-0.621764	0.621764	-1.24353	0.908051	0.718101	0.818605
POMT1	-0.655704	0.655704	-1.31141	0.861983	0.683478	0.777868
C9orf171	-0.516534	0.516534	-1.03307	1.19673	0.517118	0.92184
SURF2	-0.510013	0.510013	-1.02003	0.639321	1.14496	0.92727
EGFL7	-0.594693	0.594693	-1.18939	0.443167	1.11473	0.848239
KIAA1984	-0.517023	0.517023	-1.03405	0.733476	1.07707	0.921429
LCNL1	-0.0716518	0.0716518	-0.143304	0.808365	1.3532	1.11458
SSNA1	-0.538756	0.538756	-1.07751	1.12795	0.597466	0.902559
HDAC6	-0.598052	0.598052	-1.1961	0.964951	0.70418	0.84469
CXorf67	-0.18754	0.18754	-0.37508	0.563627	1.44111	1.09419
OTUD6A	-0.591178	0.591178	-1.18236	1.1653	0.305937	0.851917
DMRTC1B	-0.35613	0.35613	-0.71226	0.459948	1.38129	1.02945
DMRTC1	-0.35613	0.35613	-0.71226	0.459948	1.38129	1.02945
TCEAL1	-0.238473	0.238473	-0.476945	0.970264	1.17813	1.07921
TCEAL1	-0.238473	0.238473	-0.476945	0.970264	1.17813	1.07921
IL1RAPL2	-0.875577	0.875577	-1.75115	0.286022	0.34393	0.316304
CLDN2	-0.730819	0.730819	-1.46164	0.766284	0.557245	0.669967
RGAG1	-0.834637	0.834637	-1.66927	0.457616	0.448031	0.452849
CT45A1	-0.771796	0.771796	-1.54359	0.688542	0.488776	0.597073
SSR4	-0.662021	0.662021	-1.32404	1.06535	0.224091	0.7698
MIR718	-0.602596	0.602596	-1.20519	0.39586	1.11979	0.839832
NCRNA00105	-0.381702	0.381702	-0.763403	0.446648	1.36507	1.01561
